# Supplementary material for: Unraveling the electronegativity-dominated intermediate adsorption on high-entropy alloy electrocatalysts
Source: PubMed Central journal article supplement (PMC9106752; doi:10.1038/s41467-022-30379-4), 2022-05-13
Supplement: 41467_2022_30379_MOESM1_ESM.pdf [file 41467_2022_30379_MOESM1_ESM.pdf]

# Supplementary information

## Unraveling the electronegativity-dominated intermediate adsorption on high-entropy alloy electrocatalysts

Jiace Hao<sup>1,6</sup>, Zechao Zhuang<sup>2,6</sup>, Kecheng Cao<sup>3</sup>, Guohua Gao<sup>4</sup>, Chan Wang<sup>1</sup>, Feili Lai<sup>5</sup>, Shuanglong Lu<sup>1</sup>, Piming Ma<sup>1</sup>, Weifu Dong<sup>1</sup>, Tianxi Liu<sup>1</sup>, Mingliang Du<sup>1</sup>, Han Zhu<sup>1\*</sup>

<sup>1</sup> Key Laboratory of Synthetic and Biological Colloids, Ministry of Education, School of Chemical and Material Engineering, Jiangnan University, Wuxi 214122, China.

<sup>2</sup> Department of Chemistry, Tsinghua University, Beijing 100084, P. R. China.

<sup>3</sup> School of Physical Science and Technology, ShanghaiTech University, Shanghai 201210, P. R. China.

<sup>4</sup> Department of Chemistry, KU Leuven, Celestijnenlaan 200F, Leuven 3001, Belgium.

<sup>5</sup> Shanghai Key Laboratory of Special Artificial Microstructure Materials and Technology, Key Laboratory of Road and Traffic Engineering of the Ministry of Education, Tongji University, Shanghai 200092, P. R. China.

<sup>6</sup> These authors contributed equally: Jiace Hao and Zechao Zhuang. Correspondence and requests for materials should be addressed to H. Z. (email: zhysw@jiangnan.edu.cn)

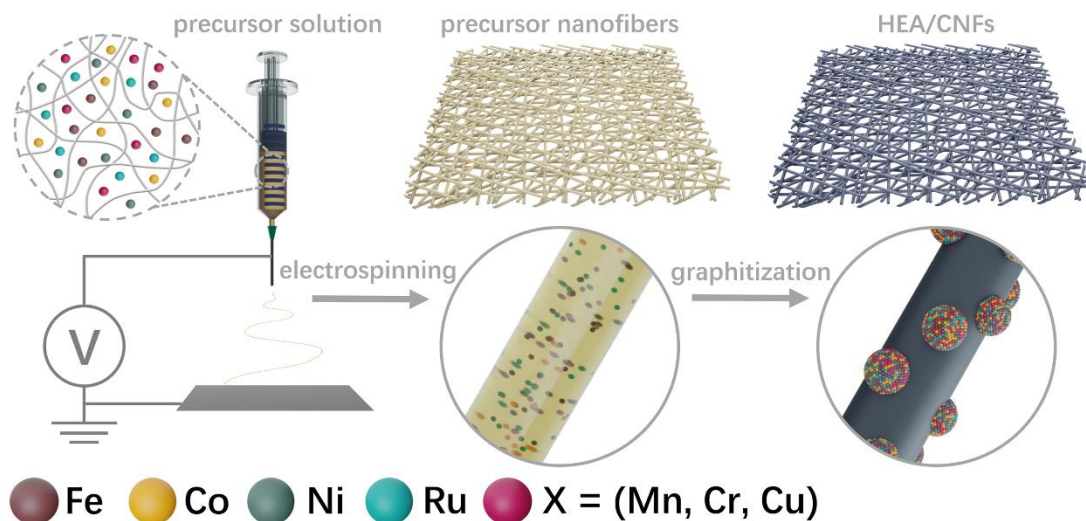

**Supplementary Fig. 1.** Schematic illustration for the synthetic processes of the FeCoNiXRu/CNFs (X=Mn, Cr and Cu).

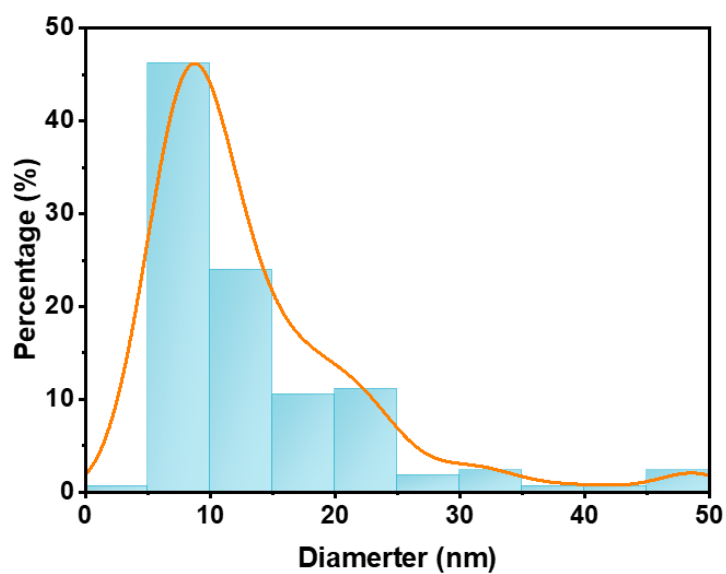

**Supplementary Fig. 2.** Average diameters of the FeCoNiMnRu HEA NPs supported on CNFs.

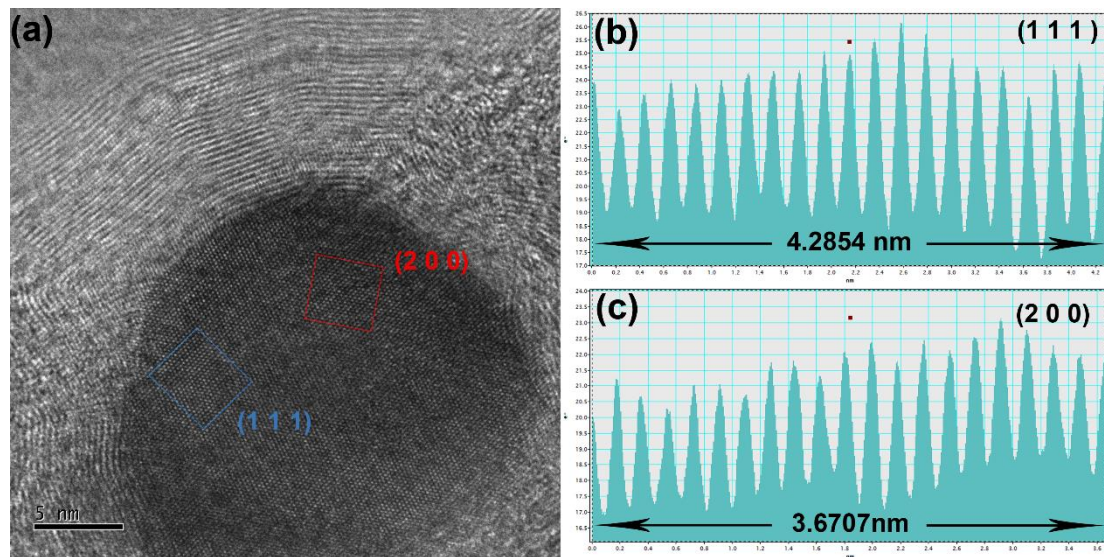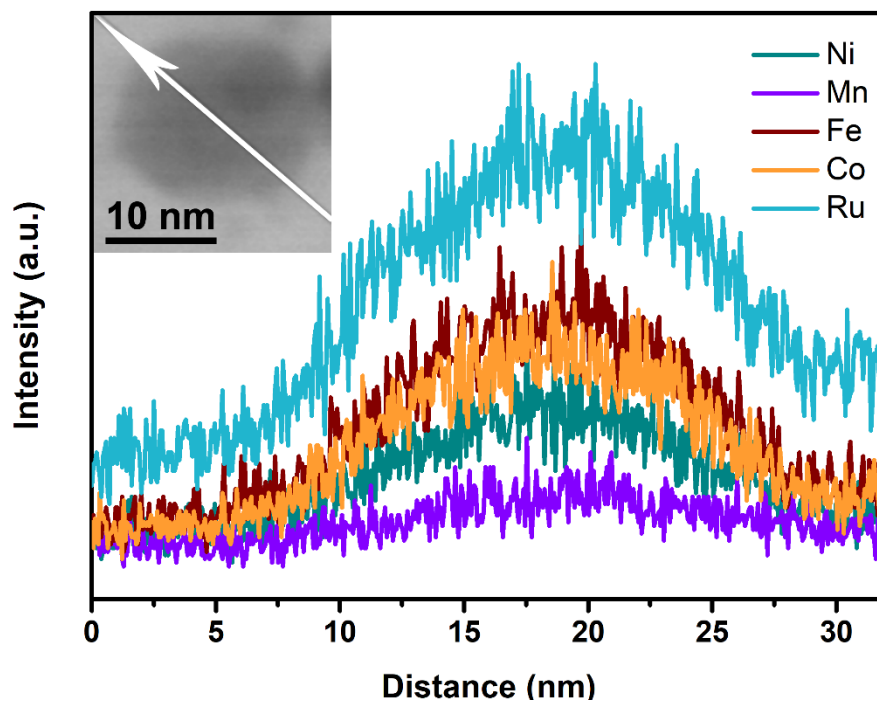

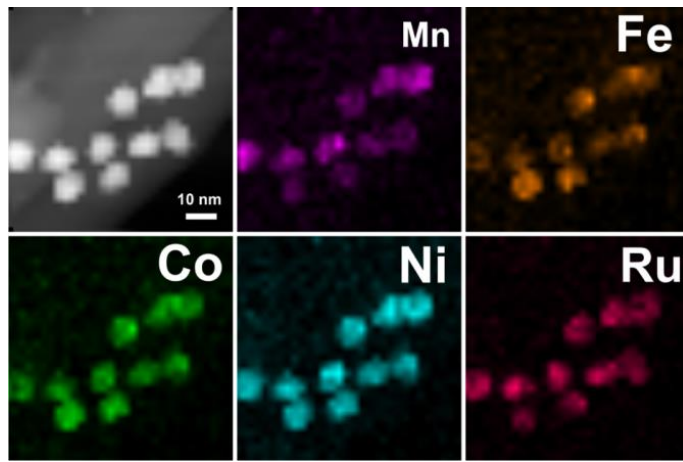

**Supplementary Fig. 5.** STEM-EDS mapping of the HEA NPs supported on CNFs.

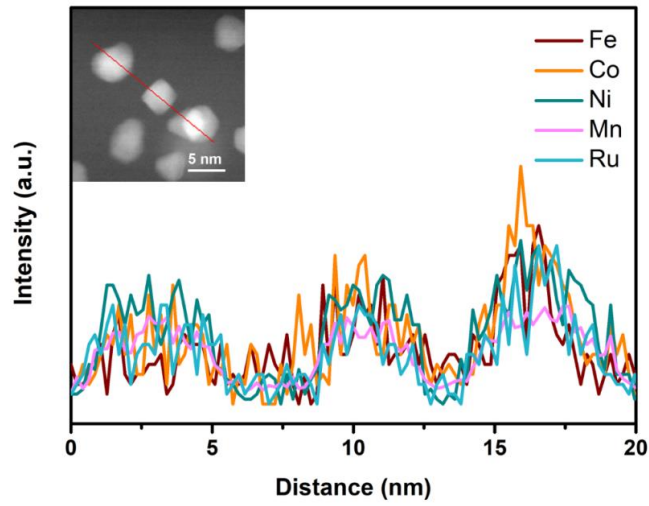

**Supplementary Fig. 6.** Line-scan STEM-EDX spectra of the HEA NPs supported on CNFs.

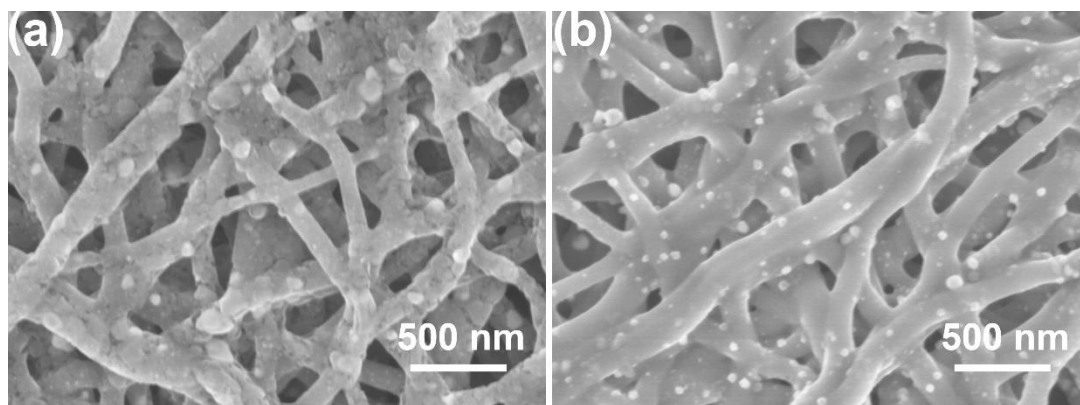

**Supplementary Fig. 7.** FE-SEM images of the (a) FeCoNiCrRu/CNFs and (b) FeCoNiCuRu/CNFs.

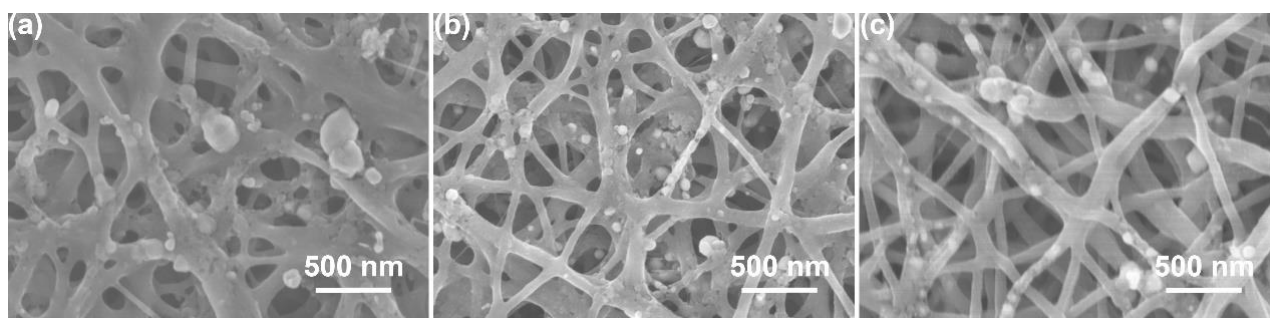

**Supplementary Fig. 8.** FE-SEM images of the as-prepared (a) FeCoNi/CNFs, (b) FeCoNiMn/CNFs, and (c) FeCoNiRu/CNFs.

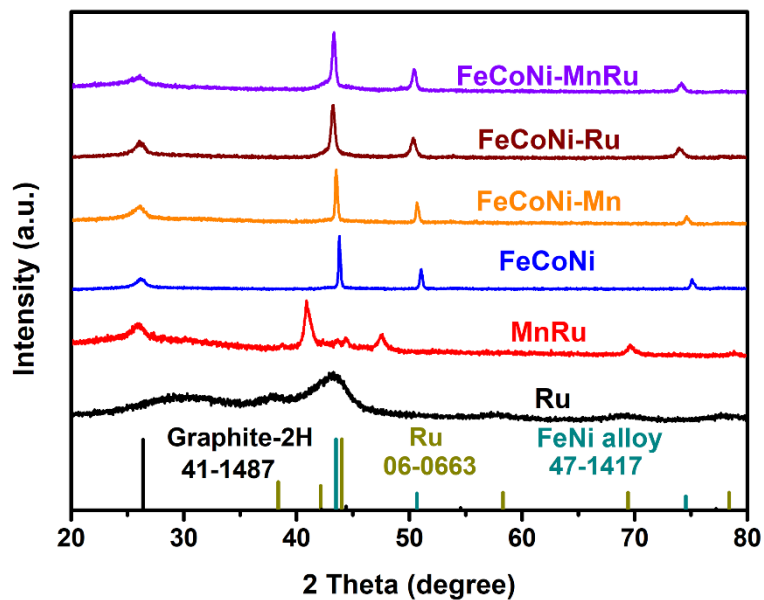

Supplementary Fig. 9. XRD patterns of FeCoNi/CNFs, FeCoNiMn/CNFs, and FeCoNiRu/CNFs.

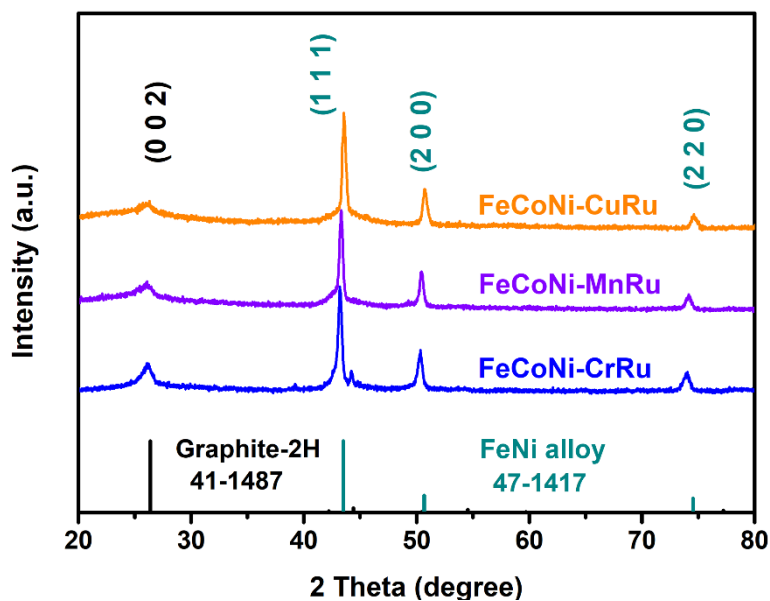

Supplementary Fig. 10. XRD patterns of FeCoNiMnRu/CNFs, FeCoNiCrRu/CNFs, and FeCoNiCuRu/CNFs.

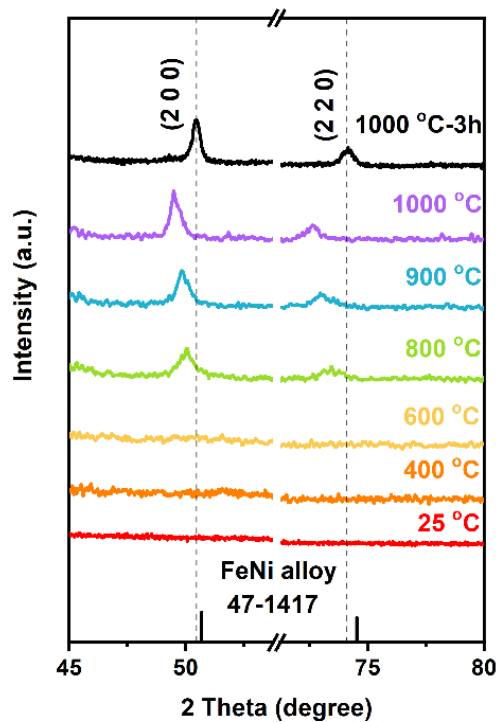

**Supplementary Fig. 11.** The enlarged *in situ* XRD patterns of FeCoNiMnRu/CNFs showing the peak shift of (200) and (220) planes.

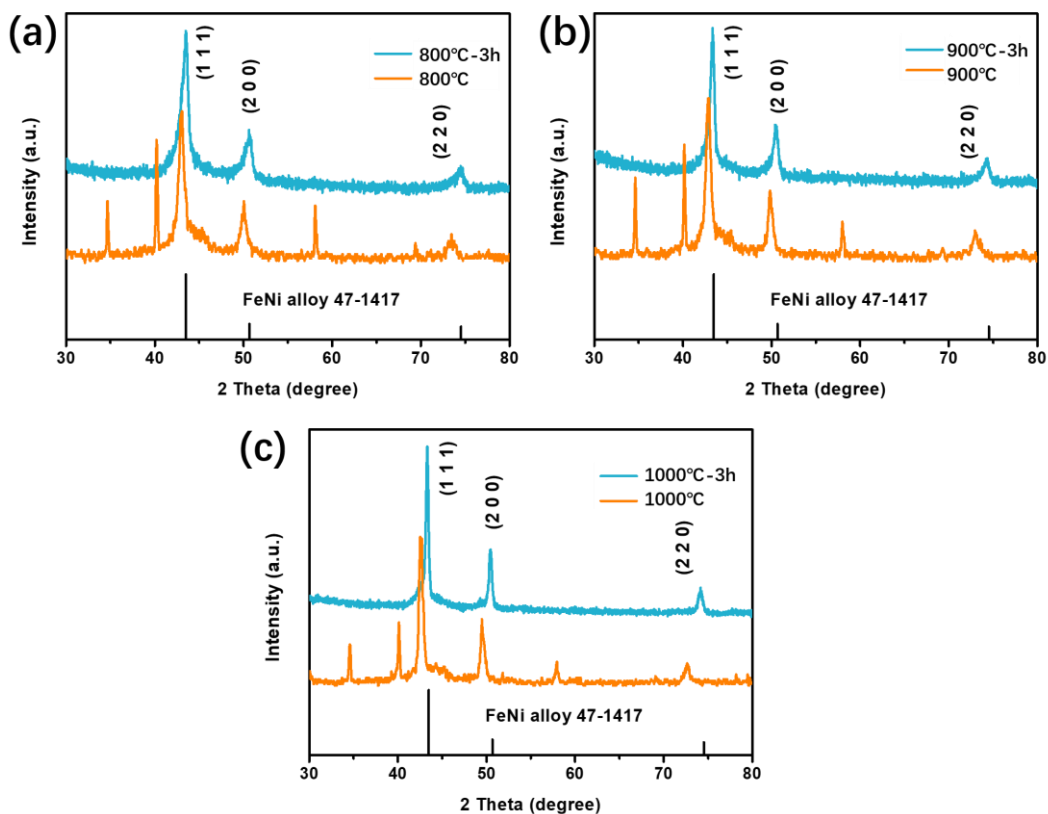

**Supplementary Fig. 12.** XRD patterns of FeCoNiMnRu/CNFs obtained after prolonged heat treatment (upper) and during *in situ* characterization (lower) at (a) 800 °C, (b) 900 °C, and 1000 °C.

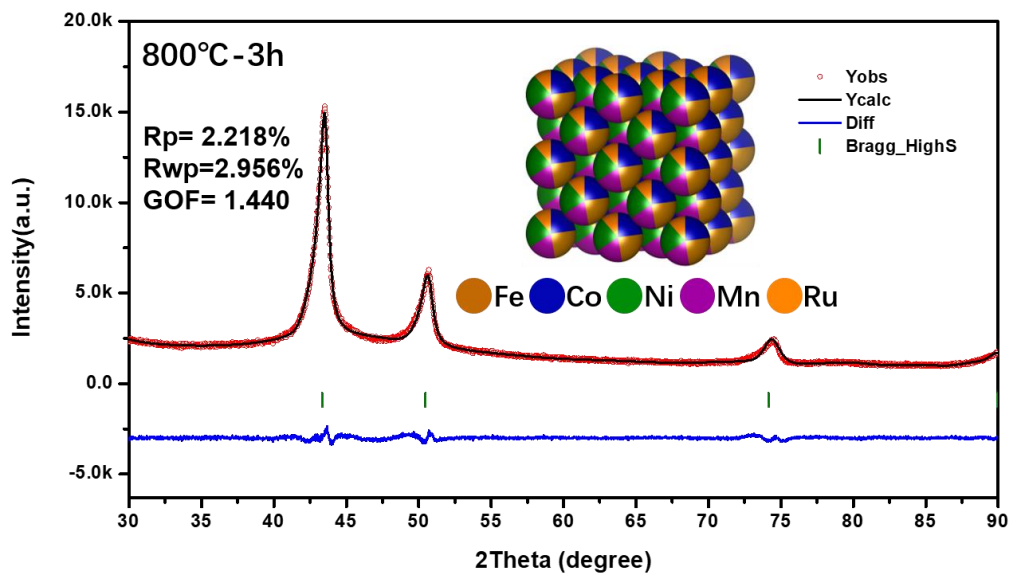

**Supplementary Fig. 13.** XRD pattern of FeCoNiMnRu/CNFs (800 °C-3 h) with a scan rate of 0.5°/min and the corresponding XRD Rietveld refinement.

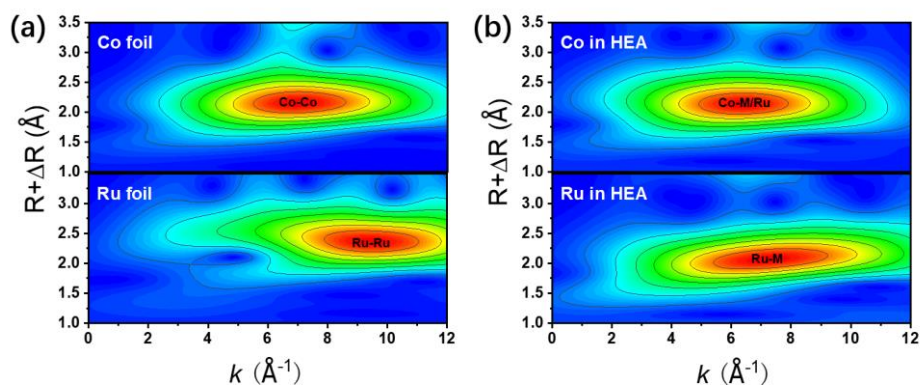

**Supplementary Figure 14.** WT-EXAFS spectra of (a) Co and Ru foil, (b) Co and Ru in FeCoNiMnRu/CNFs.



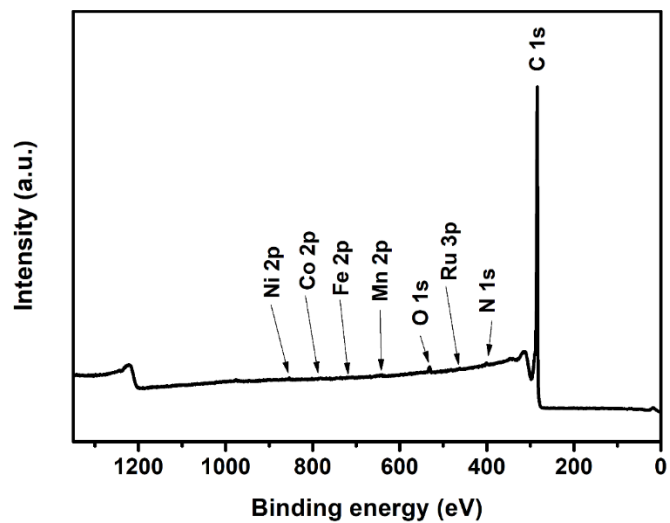

**Supplementary Fig. 15.** XPS survey spectrum of the as-prepared FeCoNiMnRu/CNFs.

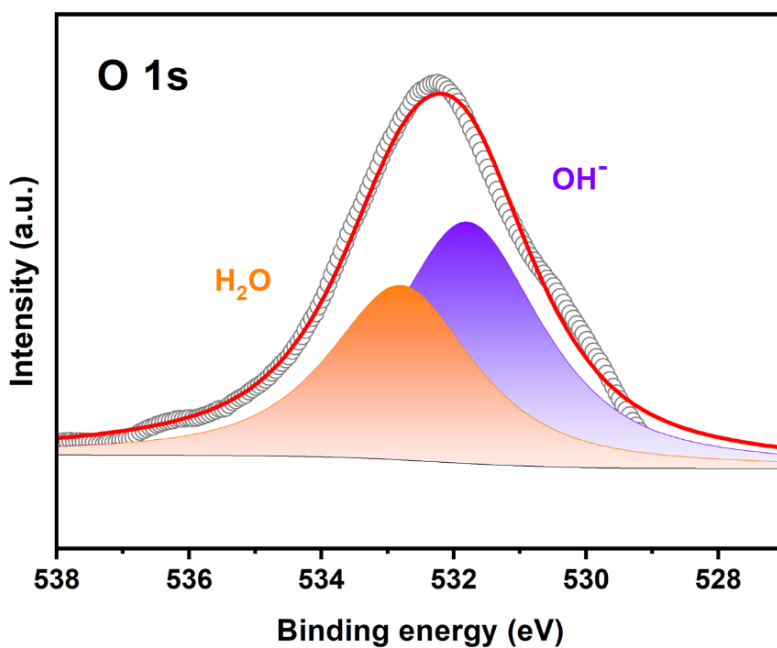

**Supplementary Fig. 16.** High-resolution O 1s XPS spectrum of FeCoNiMnRu/CNFs.

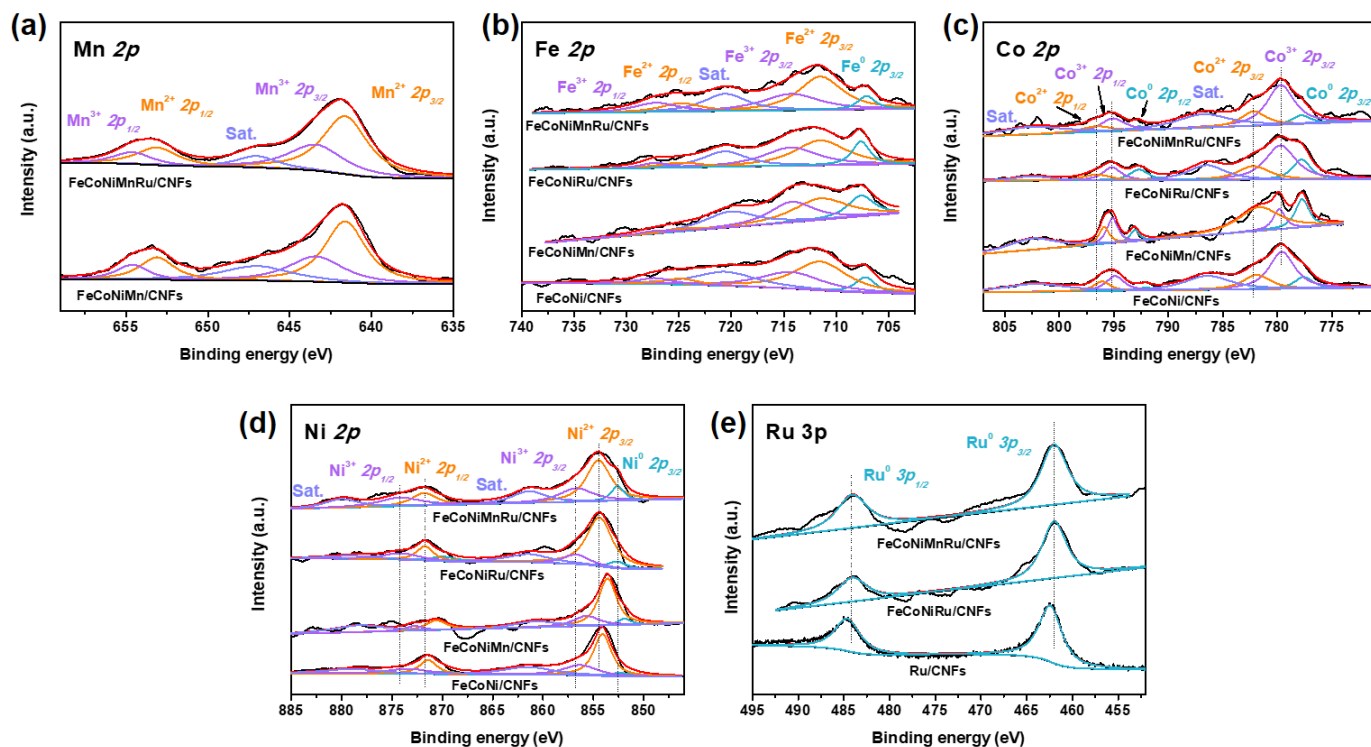

**Supplementary Fig. 17.** High-resolution (a) Mn 2p XPS spectrum of FeCoNiMn/CNFs and FeCoNiMnRu/CNFs, (b) Fe 2p, (c) Co 2p, (d) Ni 2p XPS spectra of FeCoNi/CNFs, FeCoNiMn/CNFs, FeCoNiRu/CNFs, and FeCoNiMnRu/CNFs, (e) Ru 3p XPS spectrum of Ru/CNFs, FeCoNiRu/CNFs, and FeCoNiMnRu/CNFs.

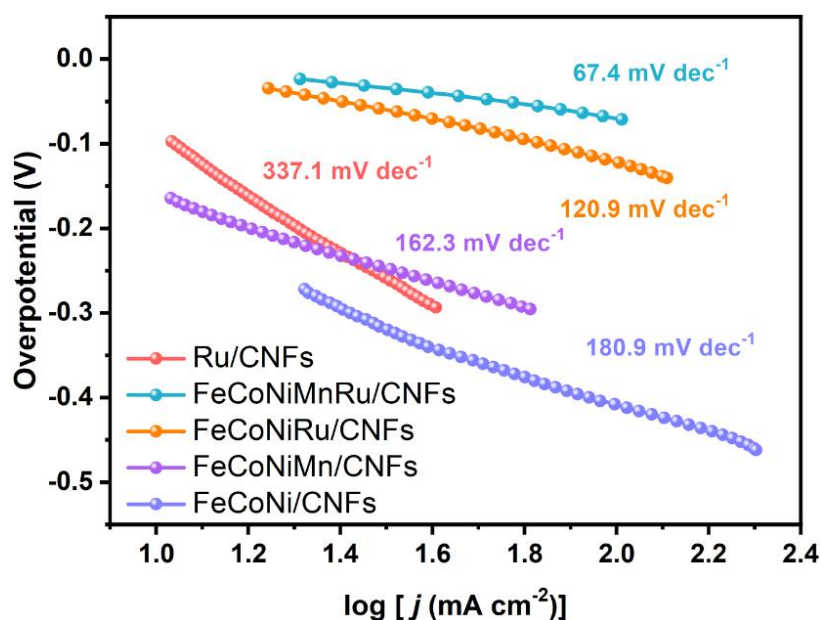

**Supplementary Fig. 18.** Tafel slopes of the as-prepared electrocatalysts for HER.

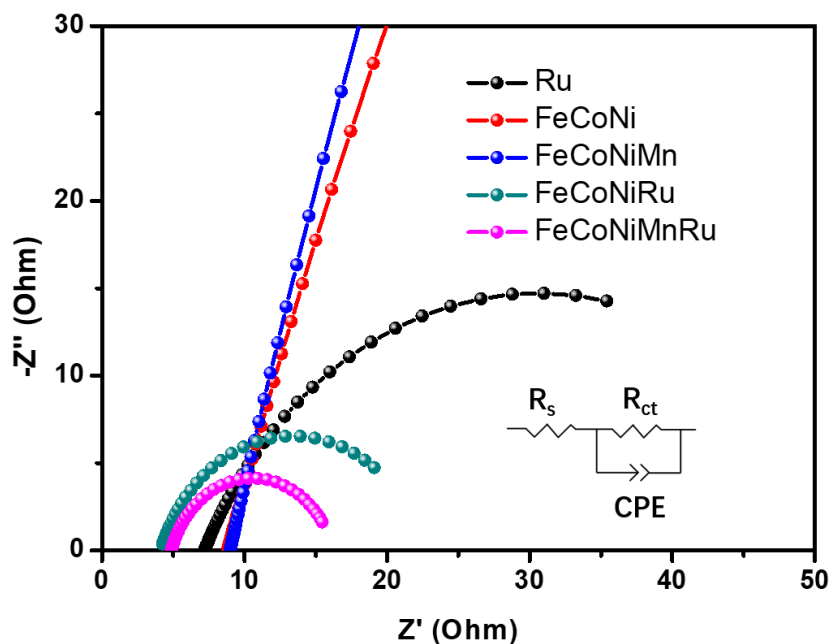

Supplementary Fig. 19. EIS spectra of the as-prepared electrocatalysts.

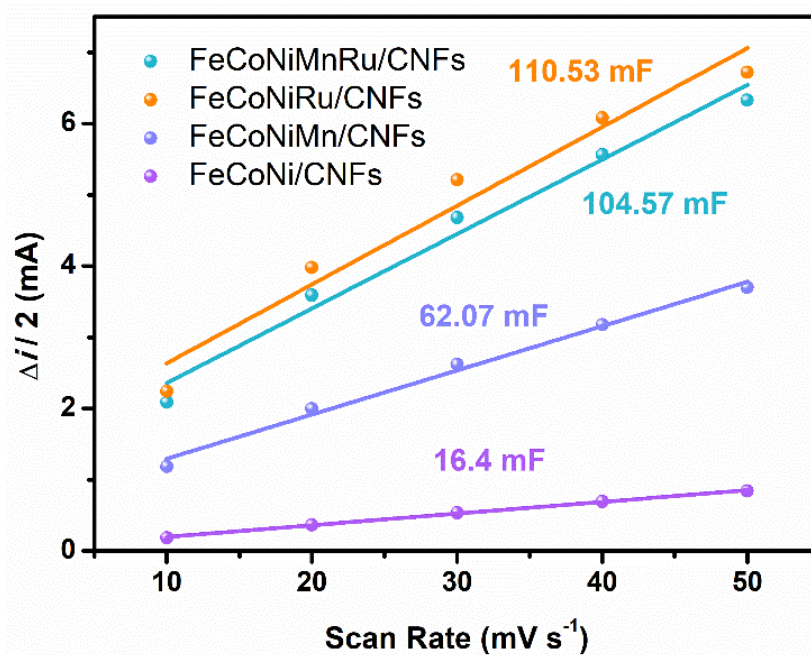

Supplementary Fig. 20. Double-layer capacitance per geometric area ( $C_{dl}$ ) of the as-prepared electrodes.

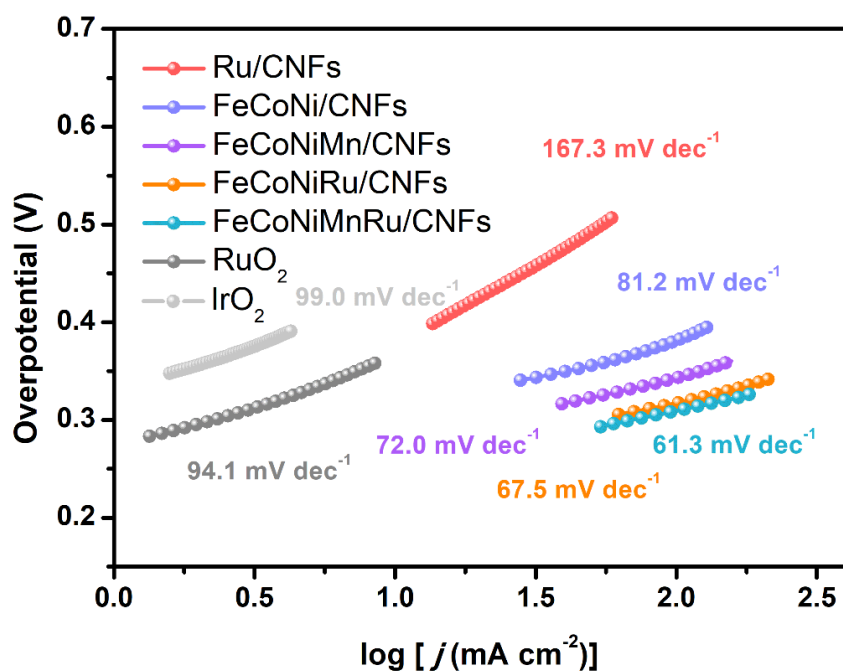

**Supplementary Fig. 21.** Tafel slopes of the as-prepared electrocatalysts for OER.

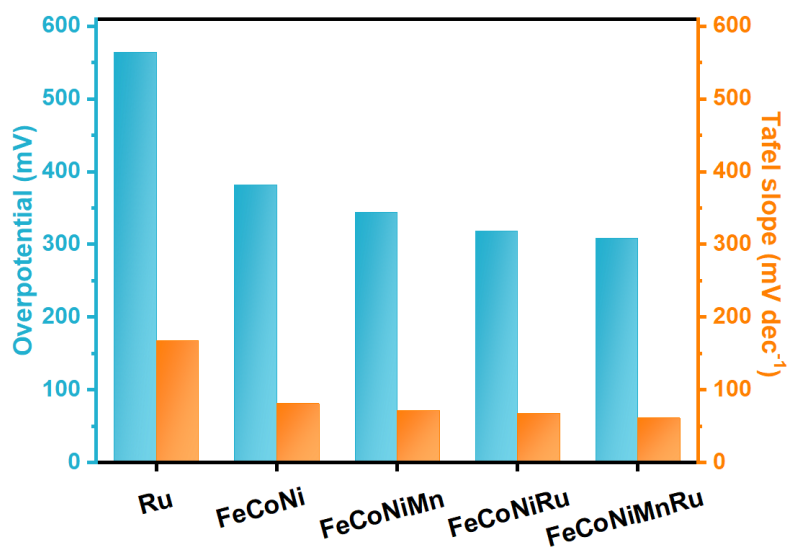

**Supplementary Fig. 22.** The corresponding histogram of OER overpotentials at 100  $\text{mA cm}^{-2}$  and Tafel slopes obtained on FeCoNi/CNFs, FeCoNiMn/CNFs, FeCoNiRu/CNFs, FeCoNiMnRu/CNFs, and Ru/C in 1.0 M KOH electrolyte.

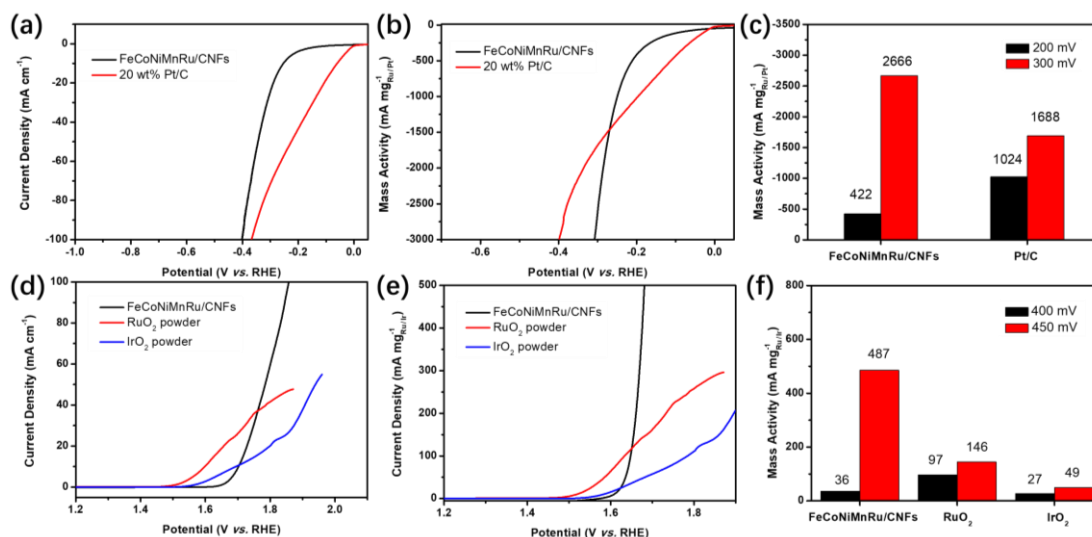

**Supplementary Fig. 23.** LSV curves of GCE supported FeCoNiMnRu/CNFs and 20 wt% Pt/C for HER normalized by (a) geometric area and (b) mass loading of noble metal (Ru or Pt). (c) The mass activities of FeCoNiMnRu/CNFs and 20 wt% Pt/C for HER at overpotentials of 200 and 300 mV. LSV curves of GCE supported FeCoNiMnRu/CNFs, RuO<sub>2</sub> powder, and IrO<sub>2</sub> powder for OER normalized by (d) geometric area and (e) mass loading of noble metal (Ru or Ir). (f) The mass activities of FeCoNiMnRu/CNFs, RuO<sub>2</sub> powder, and IrO<sub>2</sub> powder for OER at overpotentials of 400 and 450 mV.

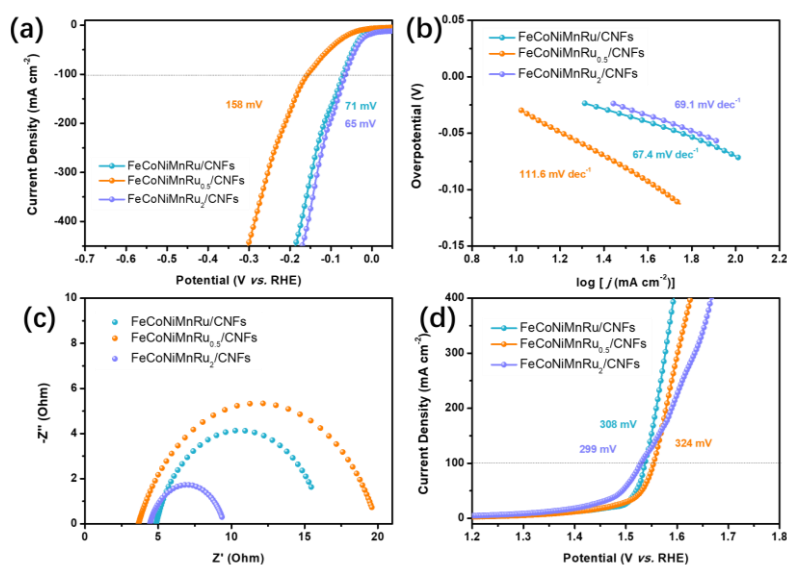

**Supplementary Fig. 24.** (a) LSV curves, corresponding (b) Tafel plots, and (c) EIS spectra of the as-prepared FeCoNiMnRu/CNFs, FeCoNiMnRu<sub>0.5</sub>/CNFs and FeCoNiMnRu<sub>2</sub>/CNFs used for HER in 1 M KOH. (d) LSV curves of the as-prepared FeCoNiMnRu/CNFs, FeCoNiMnRu<sub>0.5</sub>/CNFs and FeCoNiMnRu<sub>2</sub>/CNFs used for OER in 1 M KOH.

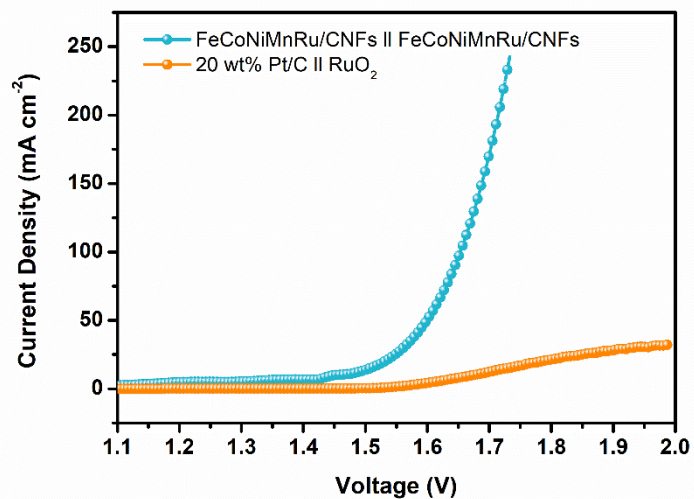

**Supplementary Fig. 25.** Polarization curves for overall water splitting by FeCoNiMnRu/CNFs || FeCoNiMnRu/CNFs and Pt/C || RuO<sub>2</sub> in a two-electrode configuration in 1 M KOH at a scan rate of 2 mV/s.

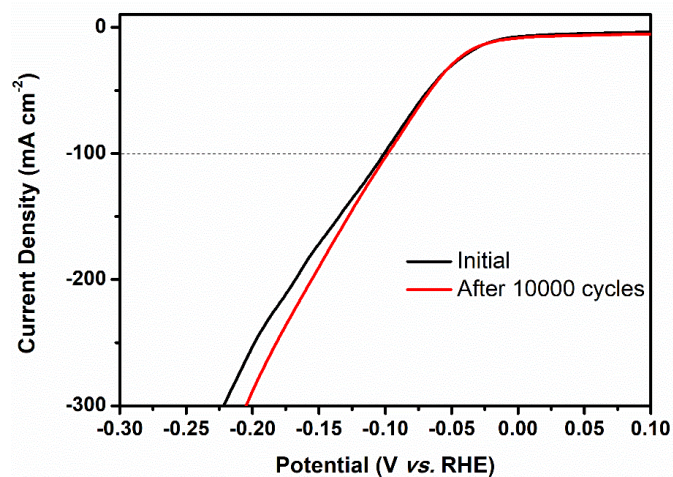

**Supplementary Fig. 26.** LSV curves of FeCoNiMnRu/CNFs before and after 10000 CV cycles.

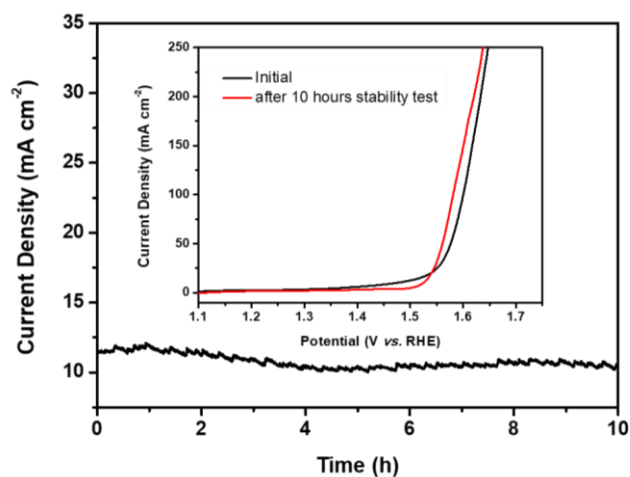

**Supplementary Fig. 27.** The chronoamperometric curve for FeCoNiMnRu/CNFs measured at 1.55 V vs. RHE for 10 h. Inset shows the LSV curves of FeCoNiMnRu/CNFs before and after stability test.

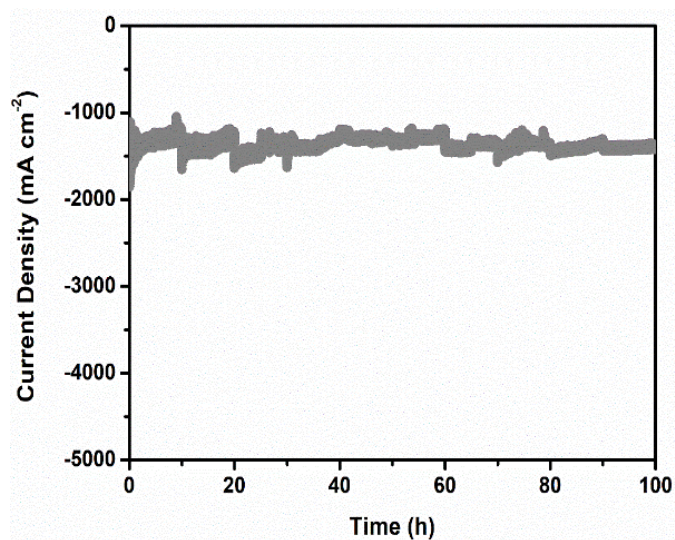

**Supplementary Fig. 28.** The chronoamperometric curve for FeCoNiMnRu/CNFs measured at 60 °C and -2.22 V vs. RHE for 100 h in 1 M KOH.

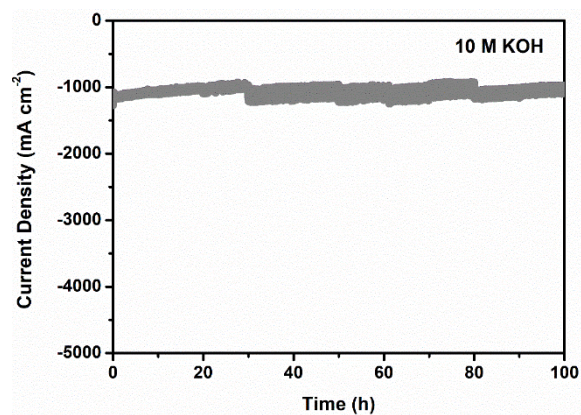

**Supplementary Fig. 29.** The chronoamperometric curve for FeCoNiMnRu/CNFs measured at -0.77 V vs. RHE for 100 h in 10 M KOH.

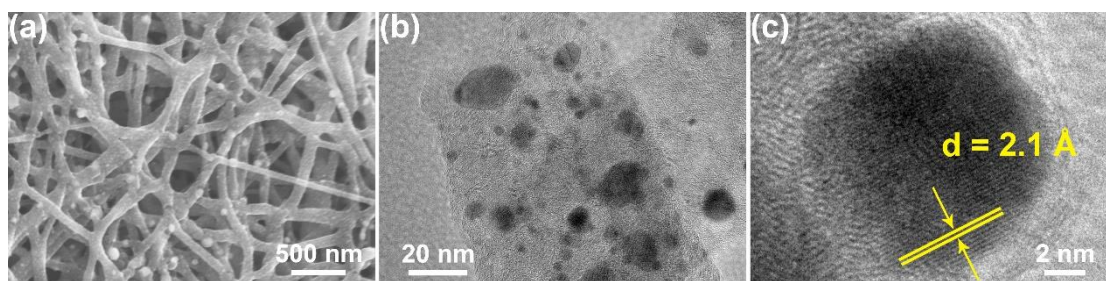

**Supplementary Fig. 30.** (a) FE-SEM, (b) TEM and (c) HRTEM images of FeCoNiMnRu/CNFs electrode after long-term stability test.



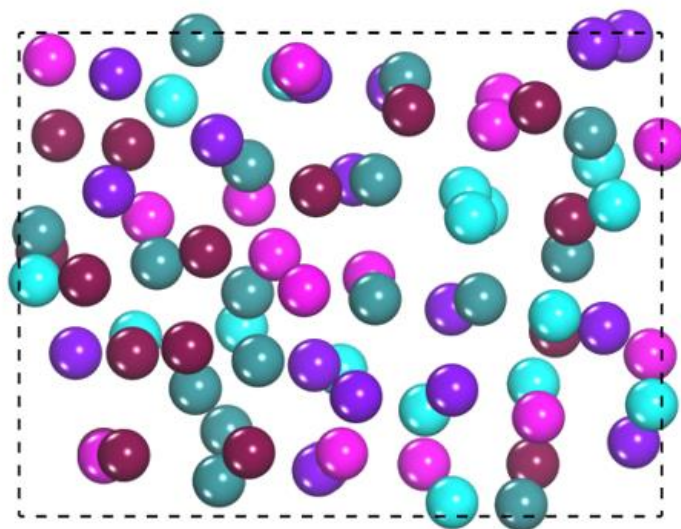

**Supplementary Fig. 31.** Chemical structure of FeCoNiMnRu HEA.

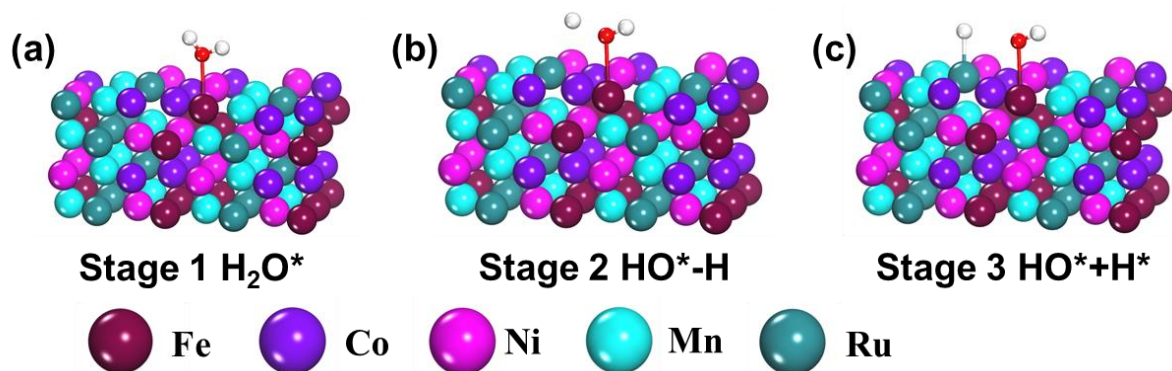

**Supplementary Fig. 32.** Atomic configurations on Fe site of FeCoNiMnRu HEA at the three stages (a-c) during the  $\text{H}_2\text{O}$  dissociation into  $\text{OH}^*$  and  $\text{H}^*$ .

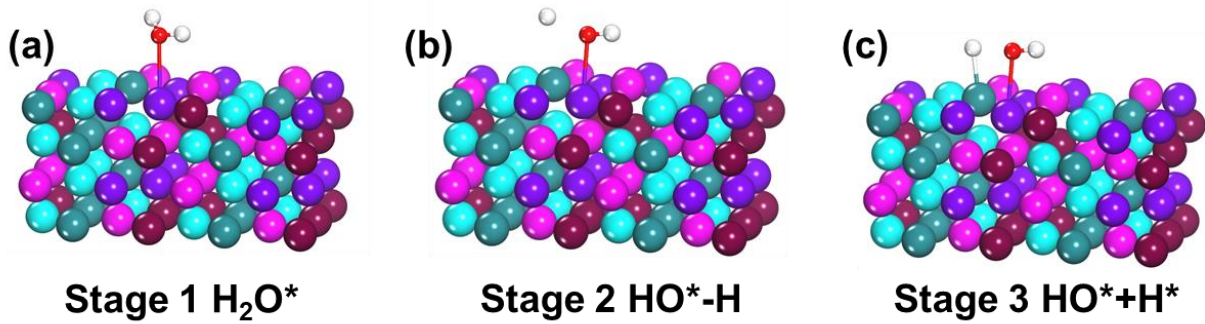

**Supplementary Fig. 33.** Atomic configurations on Co site of FeCoNiMnRu HEA at the three stages (a-c) during the  $\text{H}_2\text{O}$  dissociation into  $\text{OH}^*$  and  $\text{H}^*$ .

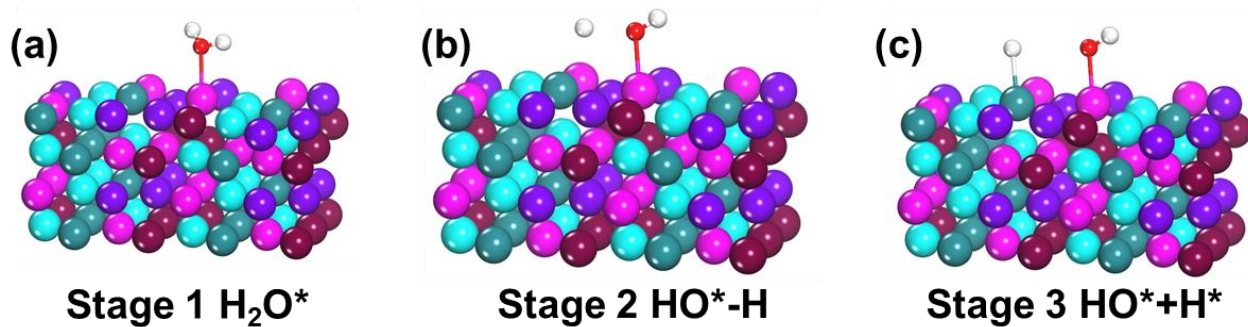

**Supplementary Fig. 34.** Atomic configurations on Ni site of FeCoNiMnRu HEA at the three stages (a-c) during the  $\text{H}_2\text{O}$  dissociation into  $\text{OH}^*$  and  $\text{H}^*$ .

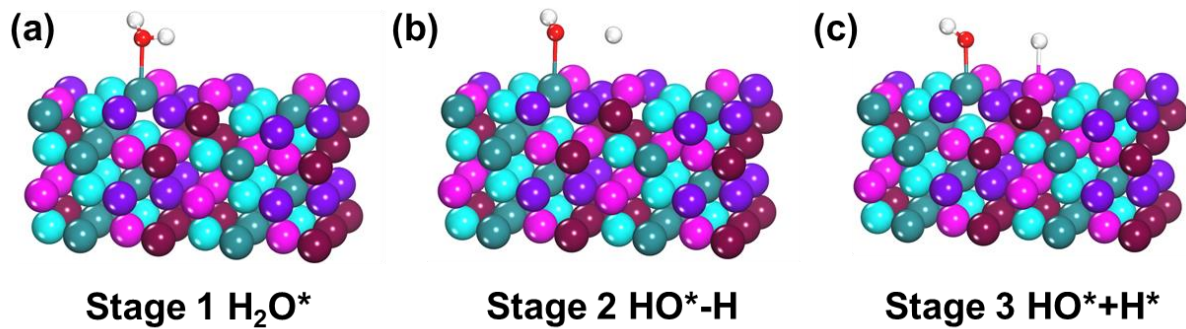

**Supplementary Fig. 35.** Atomic configurations on Ru site of FeCoNiMnRu HEA at the three stages (a-c) during the  $\text{H}_2\text{O}$  dissociation into  $\text{OH}^*$  and  $\text{H}^*$ .

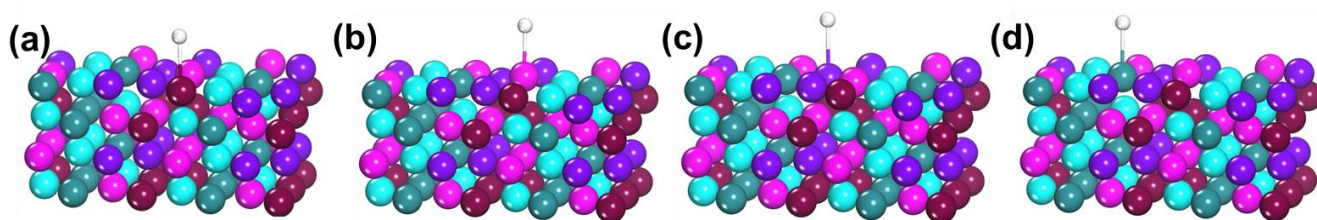

**Supplementary Fig. 36.** Atomic configurations on (a) Fe, (b) Ni, (c) Co, and (d) Ru sites of FeCoNiMnRu HEA at the stage of  $\text{H}^*$  absorption.

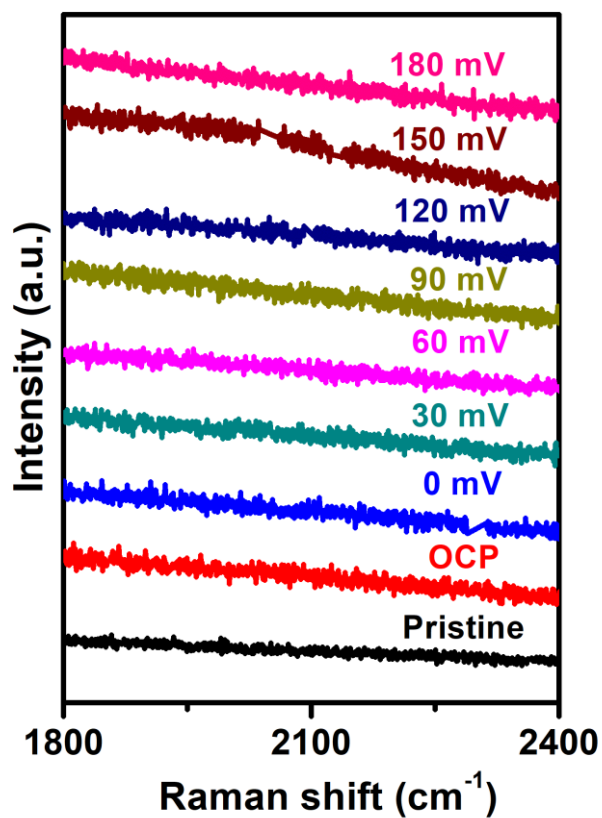

**Supplementary Fig. 37.** Operando electrochemical-Raman spectra collected by FeCoNiMn/CNFs during the HER process in 1.0 M electrolyte.

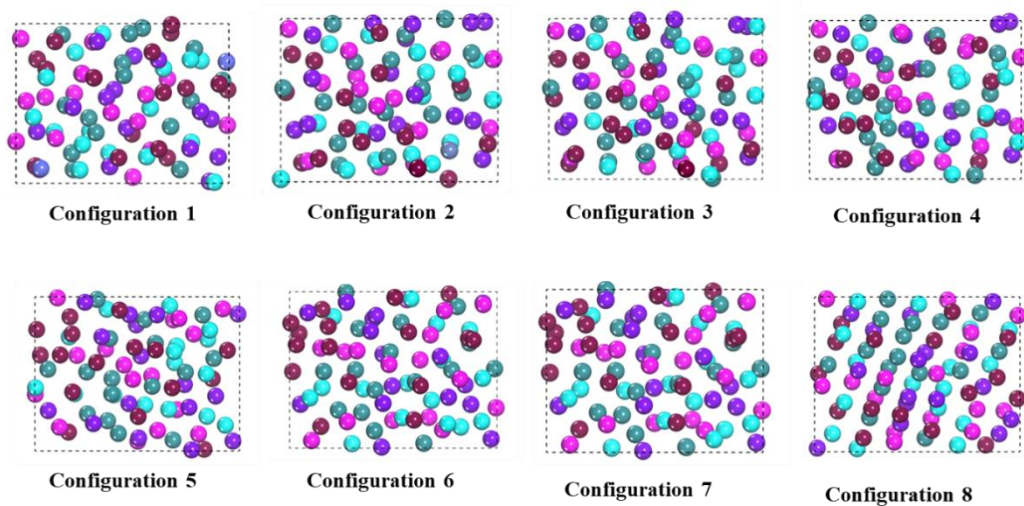

**Supplementary Fig. 38.** Different atomic configurations of FeCoNiMnRu HEA.

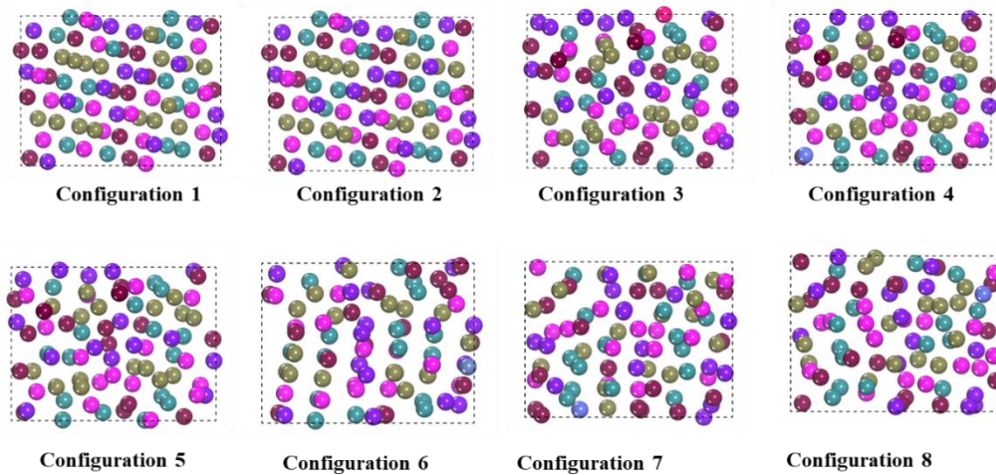

**Supplementary Fig. 39.** Different atomic configurations of FeCoNiCrRu HEA.

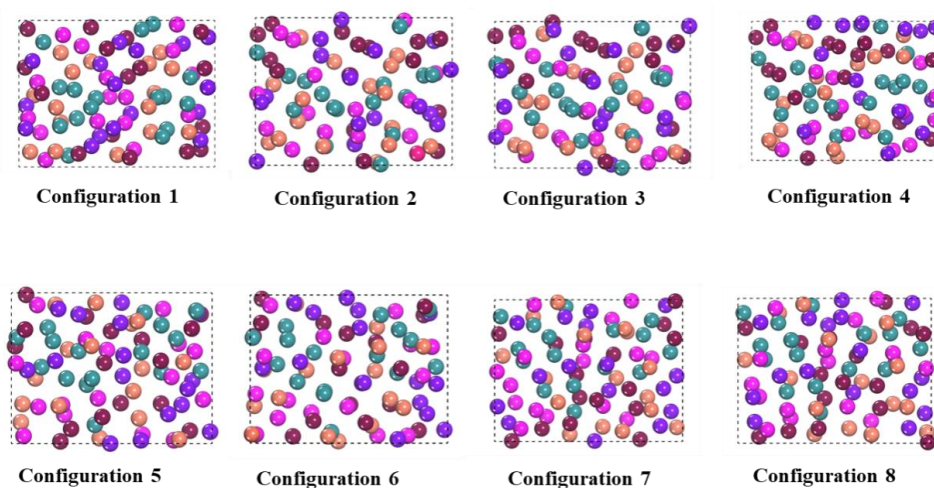

**Supplementary Fig. 40.** Different atomic configurations of FeCoNiCuRu HEA.

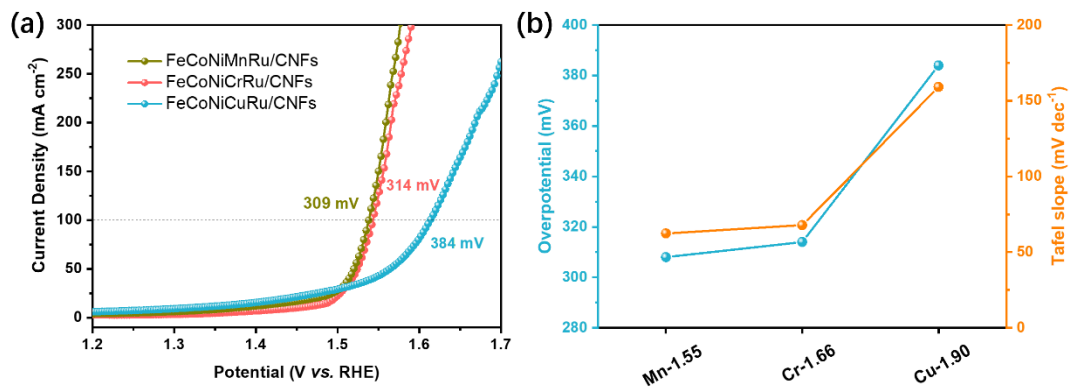

**Supplementary Fig. 41.** (a) OER polarization curves obtained for FeCoNiXRu/CNFs (X=Cr, Mn, and Cu) in 1.0 M KOH electrolyte. (b) Correlation between the OER overpotentials at 100 mA cm<sup>-2</sup>, Tafel slopes and the electronegativities of metals X (Cr, Mn, and Cu).

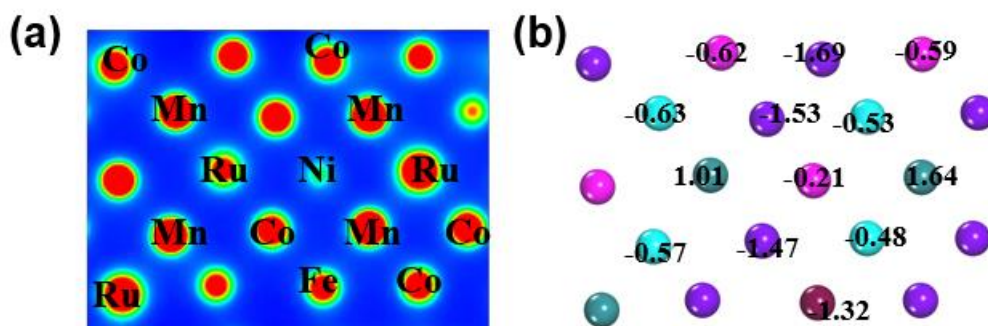

**Supplementary Fig. 42.** (a) Charge density difference analysis and (b) Bader charge analysis of FeCoNiMnRu system.

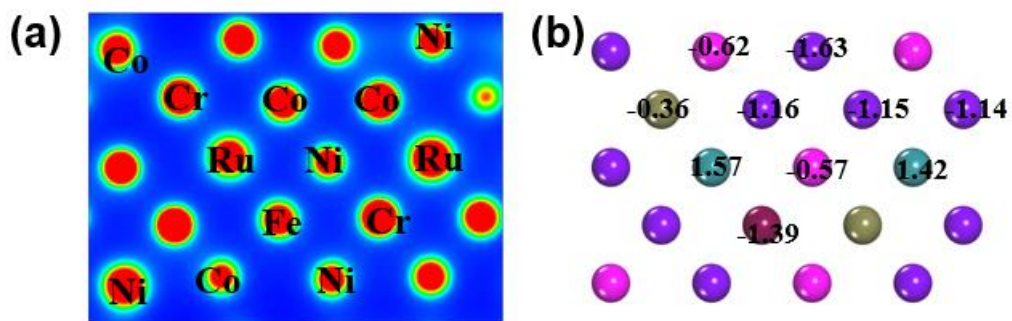

**Supplementary Fig. 43.** (a) Charge density difference analysis and (b) Bader charge analysis of FeCoNiCrRu system.

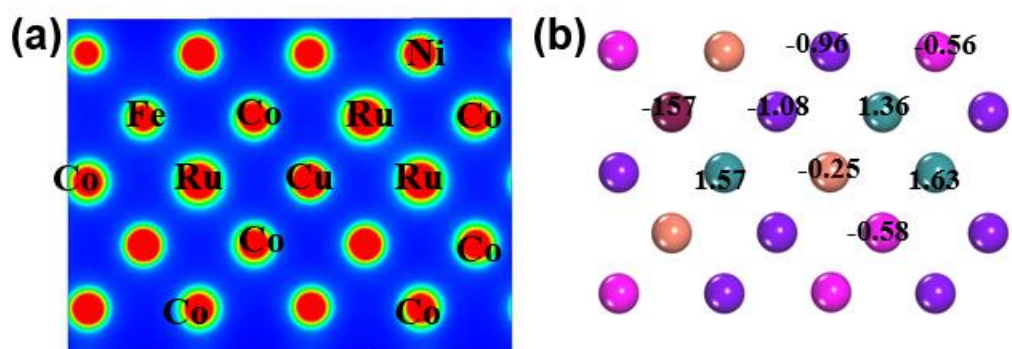

**Supplementary Fig. 44.** (a) Charge density difference analysis and (b) Bader charge analysis of FeCoNiCuRu system.

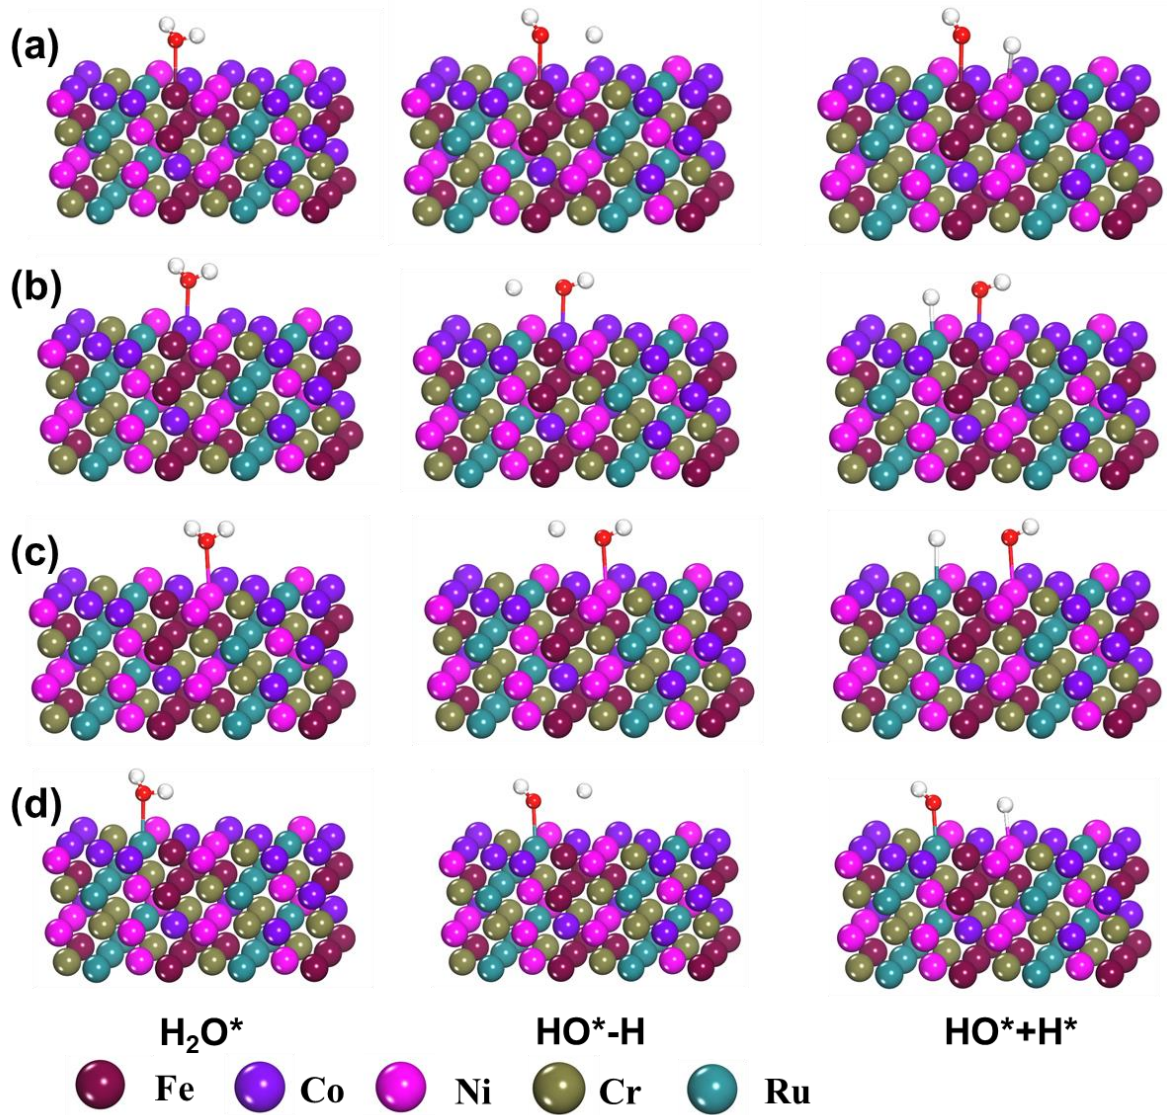

**Supplementary Fig. 45.** The atomic configurations on (a) Fe, (b) Co, (c) Ni, and (d) Ru catalytic sites of FeCoNiCrRu HEA during the water dissociation.

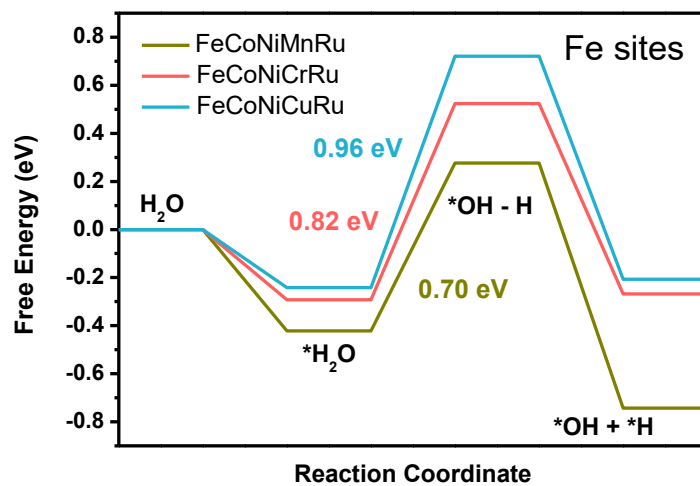

**Supplementary Fig. 46.** Reaction energy profile of water dissociation on Fe sites of FeCoNiMnRu, FeCoNiCrRu, and FeCoNiCuRu HEA surfaces.



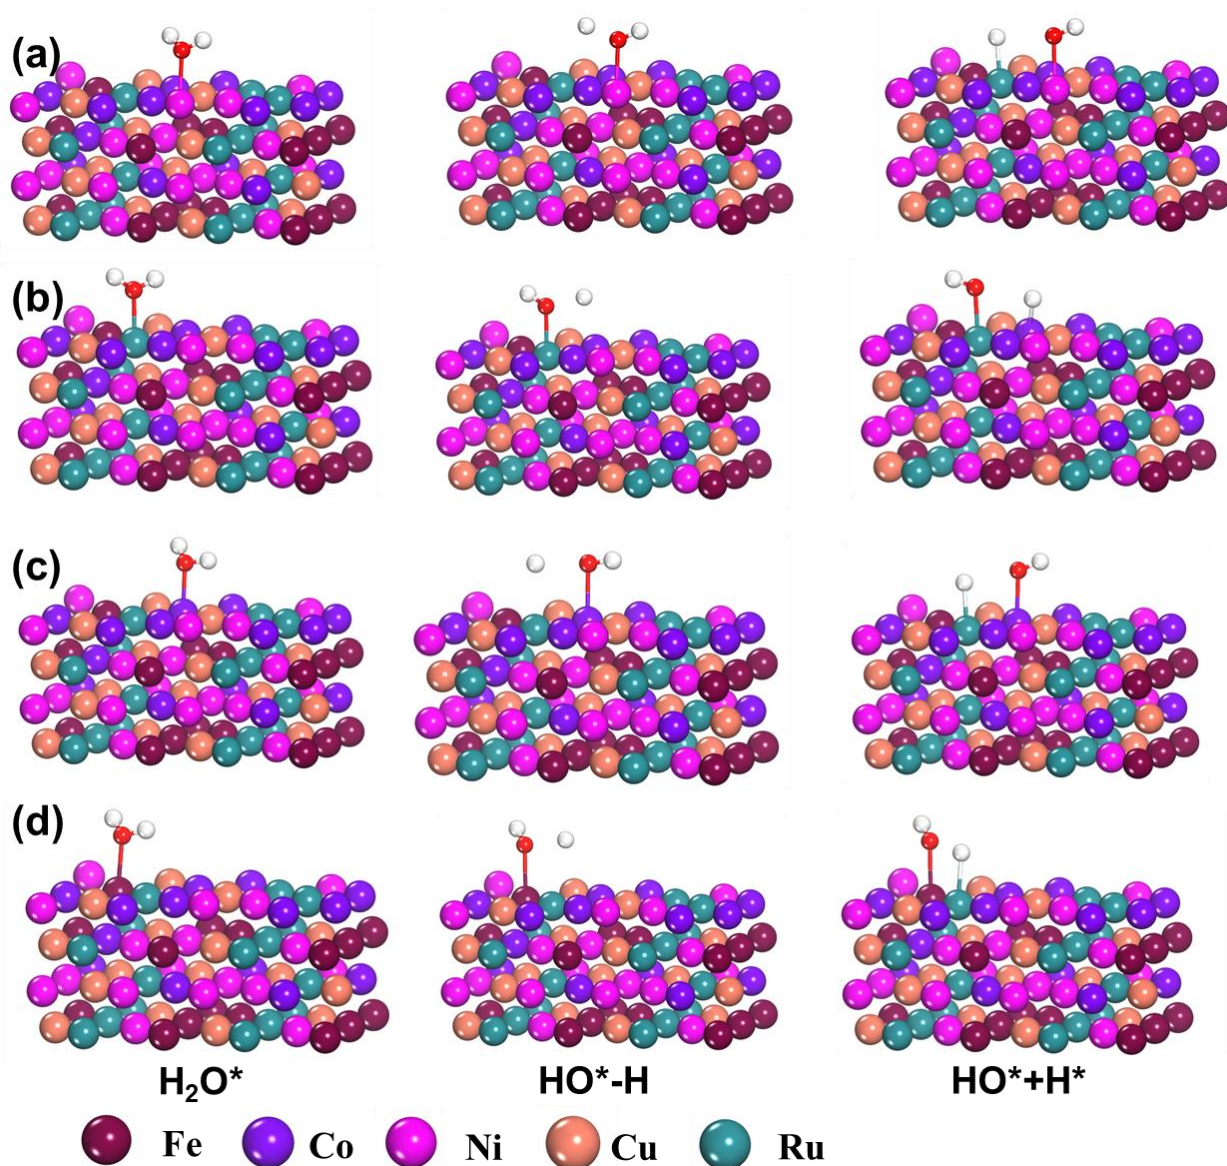

**Supplementary Fig. 47.** The atomic configurations on (a) Fe, (b) Co, (c) Ni, and (d) Ru catalytic sites of FeCoNiCuRu HEA during the water dissociation.

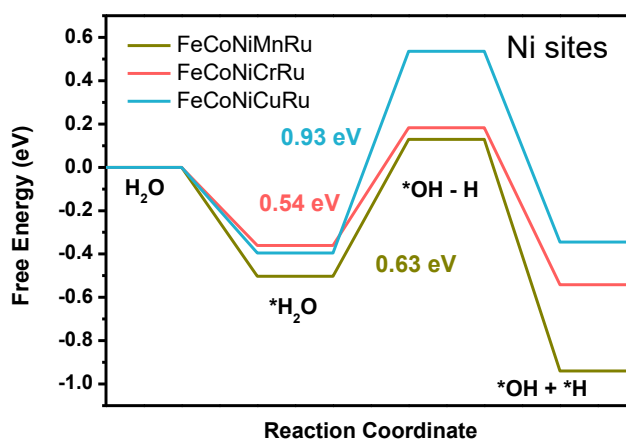

**Supplementary Fig. 48.** Reaction energy profile of water dissociation on Ni sites of FeCoNiMnRu, FeCoNiCrRu, and FeCoNiCuRu HEA surfaces.

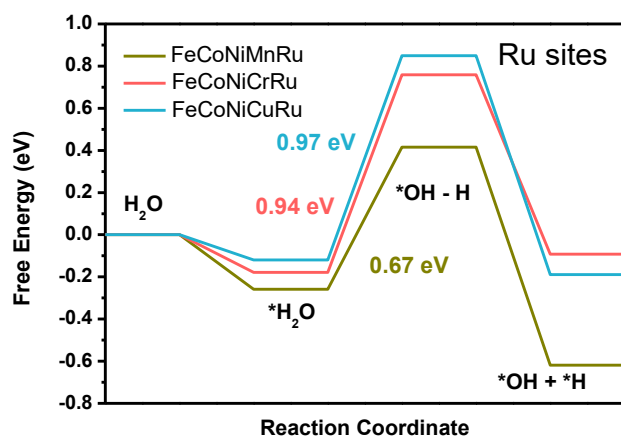

**Supplementary Fig. 49.** Reaction energy profile of water dissociation on Ru sites of FeCoNiMnRu, FeCoNiCrRu, and FeCoNiCuRu HEA surfaces.

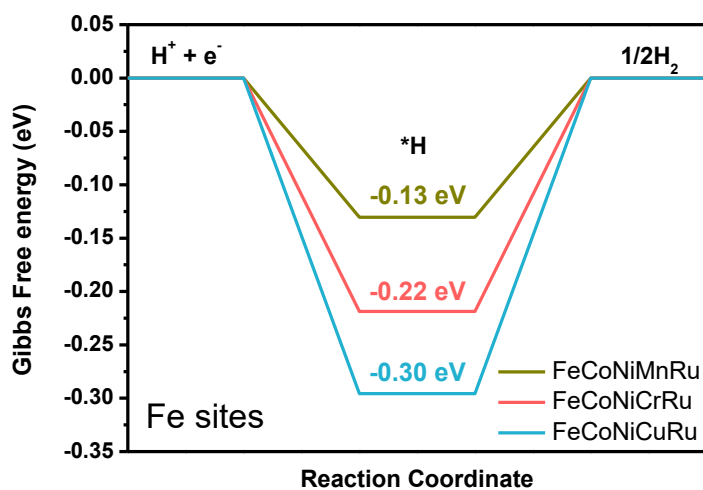

**Supplementary Fig. 50.** Gibbs free energy ( $\Delta G_{H^*}$ ) profiles on Fe sites of FeCoNiMnRu, FeCoNiCrRu, and FeCoNiCuRu HEA surfaces.

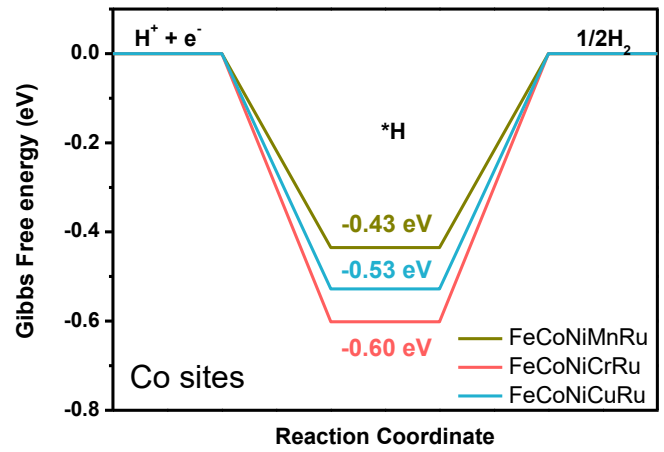

**Supplementary Fig. 51.** Gibbs free energy ( $\Delta G_{H^*}$ ) profiles on Co sites of FeCoNiMnRu, FeCoNiCrRu, and FeCoNiCuRu HEA surfaces.

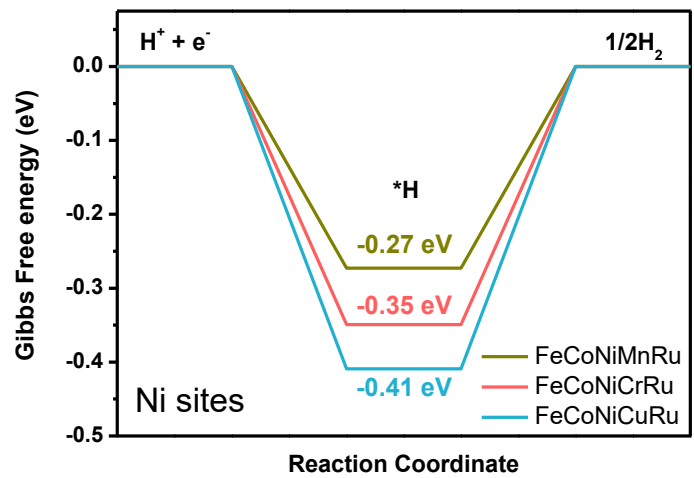

**Supplementary Fig. 52.** Gibbs free energy ( $\Delta G_{H^*}$ ) profiles on Ni sites of FeCoNiMnRu, FeCoNiCrRu, and FeCoNiCuRu HEA surfaces.

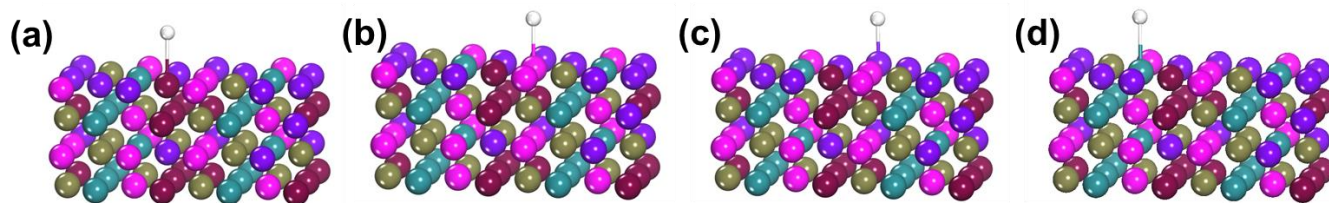

**Supplementary Fig. 53.** The atomic configurations on (a) Fe, (b) Ni, (c) Co, and (d) Ru catalytic sites of FeCoNiCrRu for H\* absorption.

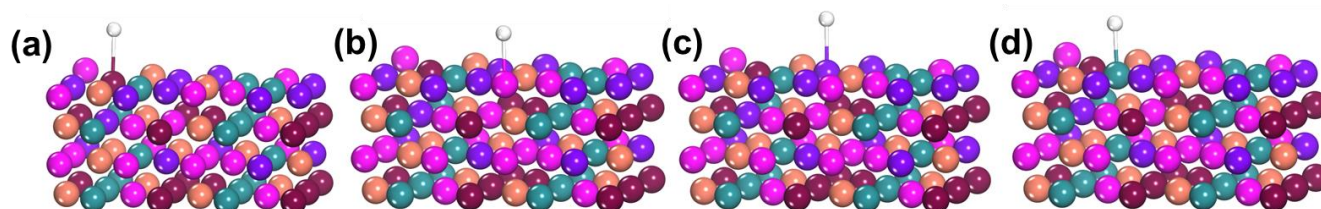

**Supplementary Fig. 54.** The atomic configurations on (a) Fe, (b) Ni, (c) Co, and (d) Ru catalytic sites of FeCoNiCuRu for H\* absorption.

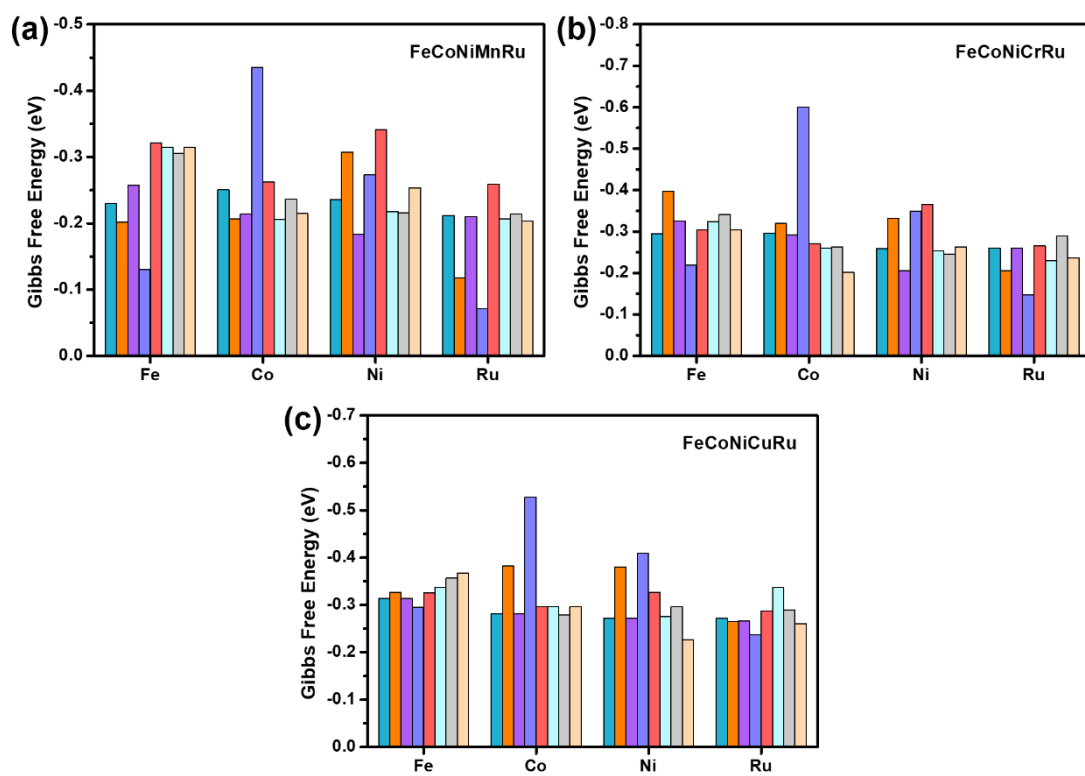

**Supplementary Fig. 55.** The summarized values of  $\Delta G_{H^*}$  on Fe-, Co-, Ni-, and Ru-sites in (a) FeCoNiMnRu, (b) FeCoNiCrRu, and (c) FeCoNiCuRu with different atomic configurations.

**Supplementary Table 1.** The mass loadings of Fe, Co, Ni, Mn, and Ru in FeCoNiMnRu/CNFs measured by ICP-OES and the corresponding atomic percentages.

| FeCoNiMnRu                | Fe    | Co    | Ni    | Mn    | Ru    |
|---------------------------|-------|-------|-------|-------|-------|
| Mass loading (wt. %)      | 2.97  | 3.05  | 2.96  | 1.78  | 4.38  |
| Atomic percentage (at. %) | 23.00 | 22.38 | 21.82 | 14.03 | 18.77 |

**Supplementary Table 2.** The mass loadings of Fe, Co, Ni, Cr, and Ru in FeCoNiCrRu/CNFs measured by ICP-OES and the corresponding atomic percentages.

| FeCoNiMnRu                | Fe    | Co    | Ni    | Cr    | Ru    |
|---------------------------|-------|-------|-------|-------|-------|
| Mass loading (wt. %)      | 2.57  | 2.82  | 2.67  | 2.68  | 4.07  |
| Atomic percentage (at. %) | 19.92 | 20.71 | 19.67 | 22.29 | 17.41 |

**Supplementary Table 3.** The mass loadings of Fe, Co, Ni, Cu, and Ru in FeCoNiCuRu/CNFs measured by ICP-OES and the corresponding atomic percentages.

| FeCoNiMnRu                | Fe    | Co    | Ni    | Cu    | Ru    |
|---------------------------|-------|-------|-------|-------|-------|
| Mass loading (wt. %)      | 2.85  | 2.95  | 2.57  | 2.54  | 4.13  |
| Atomic percentage (at. %) | 22.63 | 22.21 | 19.38 | 17.68 | 18.10 |

**Supplementary Table 4.** EXAFS fitting parameters at the Co and Ru K-edge for various samples.

| Sample                                      | Shell | $CN^a$ | $R(\text{\AA})^b$ | $\sigma^2(\text{\AA}^2)^c$ | $\Delta E_0(\text{eV})^d$ | R factor |
|---------------------------------------------|-------|--------|-------------------|----------------------------|---------------------------|----------|
| <i>Co K-edge (<math>S_0^2=0.811</math>)</i> |       |        |                   |                            |                           |          |
| Co foil                                     | Co-Co | 12*    | 2.49              | 0.0063                     | 6.9                       | 0.0023   |
| CoO                                         | Co-O  | 6.0    | 2.10              | 0.0106                     | 1.5                       | 0.0053   |
|                                             | Co-Co | 12.0   | 3.01              | 0.0080                     |                           |          |
| Co <sub>3</sub> O <sub>4</sub>              | Co-O  | 6.2    | 1.91              | 0.0035                     | -8.1                      | 0.0079   |
|                                             | Co-Co | 6.1    | 2.86              | 0.0048                     |                           |          |
| FeCoNiMn Ru/CNFs before stability test      | Co-Co | 7.4    | 3.36              | 0.0048                     | 4.5                       | 0.0059   |
|                                             | Co-Co | 7.2    | 2.51              | 0.0066                     |                           |          |
| FeCoNiMn Ru/CNFs after stability test       | Co-Co | 1.4    | 2.49              | 0.0066                     | 3.0                       | 0.0071   |
|                                             | Co-Ru | 6.9    | 2.50              | 0.0085                     |                           |          |
|                                             | Co-Ru | 0.3    | 2.52              | 0.0085                     |                           |          |
|                                             |       |        |                   |                            |                           |          |
| <i>Ru K-edge (<math>S_0^2=0.816</math>)</i> |       |        |                   |                            |                           |          |
| Ru foil                                     | Ru-Ru | 12*    | 2.67              | 0.0033                     | 6.6                       | 0.0071   |
|                                             | Ru-O  | 6.0    | 1.98              | 0.0035                     |                           |          |
| RuO <sub>2</sub>                            | Ru-Ru | 3.0    | 3.12              | 0.0045                     | 2.4                       | 0.0085   |
|                                             | Ru-Ru | 11.7   | 3.56              | 0.0045                     |                           |          |

|                                                    |       |     |      |        |      |        |
|----------------------------------------------------|-------|-----|------|--------|------|--------|
| FeCoNiMn<br>Ru/CNFs<br>before<br>stability<br>test | Ru-Co | 6.7 | 2.52 | 0.0049 | -3.0 | 0.0059 |
|----------------------------------------------------|-------|-----|------|--------|------|--------|

---

**Supplementary Table 5.** The summarized binding energies for Ru/CNFs, FeCoNi/CNFs, FeCoNiMn/CNFs, FeCoNiRu/CNFs, and FeCoNiMnRu/CNFs.

|                                    | Ru/CNFs | FeCoNi/CNFs | FeCoNiMn/CNFs | FeCoNiRu/CNFs | FeCoNiMnRu/CNFs |
|------------------------------------|---------|-------------|---------------|---------------|-----------------|
| Mn <sup>2+</sup> 2p <sub>3/2</sub> | /       | /           | 641.6         | /             | 641.6           |
| Mn <sup>2+</sup> 2p <sub>1/2</sub> | /       | /           | 653.1         | /             | 653.1           |
| Mn <sup>3+</sup> 2p <sub>3/2</sub> | /       | /           | 643.4         | /             | 643.4           |
| Mn <sup>3+</sup> 2p <sub>1/2</sub> | /       | /           | 654.6         | /             | 654.6           |
| Fe <sup>0</sup> 2p <sub>3/2</sub>  | /       | 707.2       | 707.6         | 707.6         | 707.1           |
| Fe <sup>2+</sup> 2p <sub>3/2</sub> | /       | 711.5       | 711.5         | 711.5         | 711.5           |
| Fe <sup>2+</sup> 2p <sub>1/2</sub> | /       | 724.8       | 724.8         | 724.8         | 724.8           |
| Fe <sup>3+</sup> 2p <sub>3/2</sub> | /       | 714.3       | 714.3         | 714.3         | 714.3           |
| Fe <sup>3+</sup> 2p <sub>1/2</sub> | /       | 727.3       | 727.3         | 727.3         | 727.2           |
| Co <sup>0</sup> 2p <sub>3/2</sub>  | /       | 777.6       | 777.7         | 777.8         | 777.8           |
| Co <sup>0</sup> 2p <sub>1/2</sub>  | /       | 792.1       | 793.1         | 792.7         | 792.7           |
| Co <sup>2+</sup> 2p <sub>3/2</sub> | /       | 781.9       | 781.7         | 782.2         | 782.2           |
| Co <sup>2+</sup> 2p <sub>1/2</sub> | /       | 796.1       | 759.9         | 796.6         | 796.6           |
| Co <sup>3+</sup> 2p <sub>3/2</sub> | /       | 779.6       | 779.8         | 779.7         | 779.7           |
| Co <sup>3+</sup> 2p <sub>1/2</sub> | /       | 794.9       | 795.1         | 795.2         | 795.1           |
| Ni <sup>0</sup> 2p <sub>3/2</sub>  | /       | 852.4       | 851.9         | 852.6         | 852.6           |
| Ni <sup>0</sup> 2p <sub>1/2</sub>  | /       | 869.7       | /             | 869.9         | 869.9           |
| Ni <sup>2+</sup> 2p <sub>3/2</sub> | /       | 854.1       | 853.6         | 854.4         | 854.5           |
| Ni <sup>2+</sup> 2p <sub>1/2</sub> | /       | 871.4       | 870.6         | 871.7         | 871.8           |
| Ni <sup>3+</sup> 2p <sub>3/2</sub> | /       | 856.3       | 855.7         | 856.7         | 856.7           |
| Ni <sup>3+</sup> 2p <sub>1/2</sub> | /       | 873.4       | 872.8         | 874.1         | 874.2           |
| Ru <sup>0</sup> 3p <sub>3/2</sub>  | 462.4   | /           | /             | 462.0         | 462.0           |
| Ru <sup>0</sup> 3p <sub>1/2</sub>  | 484.6   | /           | /             | 484.1         | 484.1           |

**Supplementary Table 6.** Summarized overpotentials at 10 mA cm<sup>-2</sup> ( $\eta_{10}$ ) and Tafel slopes of electrocatalysts for HER in 1.0 M KOH.

| Electrocatalysts                               | $\eta_{10}$ (mV) | Tafel slope (mV dec <sup>-1</sup> ) | Ref              |
|------------------------------------------------|------------------|-------------------------------------|------------------|
| <b>FeCoNiMnRu/CNFs</b>                         | <b>5</b>         | <b>67.4</b>                         | <b>This work</b> |
| CuAlNiMoFe                                     | 9.7              | 60                                  | 1                |
| FeCoNiAlTi                                     | 88.2             | 40.1                                | 2                |
| NiFeMoCoCr                                     | 172              | 66                                  | 3                |
| Ru/CoO NRs                                     | 55               | 72                                  | 4                |
| FeNiCoCrMn-G                                   | 210              | 105                                 | 5                |
| PdPtCuNiP                                      | 32               | 37.4                                | 6                |
| (Ru-Co)O <sub>x</sub>                          | 44.1             | 23.5                                | 7                |
| Ru <sub>1</sub> Ni <sub>1</sub> -NCNFs         | 35               | 30                                  | 8                |
| RFNOH-10                                       | 13               | 30.0                                | 9                |
| RuO <sub>2</sub> /NiO/NF                       | 22               | 31.7                                | 10               |
| Ru-NiFe-P                                      | 44               | 80                                  | 11               |
| Ru-MoS <sub>2</sub> /CC                        | 41               | 114                                 | 12               |
| Ru-NiCo-LDH                                    | 28               | 42                                  | 13               |
| NiFe-MOF-5                                     | 163              | 139                                 | 14               |
| Ru/NF-2                                        | 10               | 34                                  | 15               |
| ECM@Ru                                         | 83               | 59                                  | 16               |
| ES-Ru-ZIF-900                                  | 21               | 64                                  | 17               |
| Ru/PC                                          | 21               | 46.6                                | 18               |
| Ru-RuO <sub>2</sub> /MoO <sub>3</sub> CNRs-350 | 9.2              | 37                                  | 19               |
| Ru/Ni(OH) <sub>2</sub> /NF                     | 25               | 47                                  | 20               |
| Ru <sub>1.0</sub> /NF                          | 47               | 60                                  | 21               |
| Ru@NGT/Ni foam                                 | 45               | 81                                  | 22               |
| Ru-Co <sub>3</sub> O <sub>4</sub> -NiO-NF      | 44               | 53.9                                | 23               |
| Ru-CoV-LDH/NF                                  | 32               | 36.4                                | 24               |



**Supplementary Table 7.** Summarized overpotentials at 10 mA cm<sup>-2</sup> ( $\eta_{10}$ ) and Tafel slopes of electrocatalysts for OER in 1.0 M KOH.

| Electrocatalysts                                                                          | $\eta_{10}$ (mV) | Tafel slope (mV dec <sup>-1</sup> ) | Ref              |
|-------------------------------------------------------------------------------------------|------------------|-------------------------------------|------------------|
| <b>FeCoNiMnRu/CNFs</b>                                                                    | <b>145</b>       | <b>61.3</b>                         | <b>This work</b> |
| FeCoNiPB/(FeCoNi) <sub>3</sub> O <sub>4-x</sub>                                           | 229              | 146                                 | 25               |
| MnFeCoNi HEA                                                                              | 302              | 83.7                                | 26               |
| Fe <sub>29</sub> Co <sub>27</sub> Ni <sub>23</sub> Si <sub>9</sub> B <sub>12</sub> ribbon | 230              | 85                                  | 27               |
| CoCrFeNiMo-20 Mg                                                                          | 220              | 59.0                                | 28               |
| MCPS                                                                                      | 288              | 27.7                                | 29               |
| La(CrMnFeCo <sub>2</sub> Ni)O <sub>3</sub> HEPO                                           | 325              | 51.2                                | 30               |
| CoCuFeMoOOH@Cu                                                                            | 199              | 48.8                                | 31               |
| FeNiCoCrMn-G                                                                              | 229              | 40                                  | 5                |
| HEF7                                                                                      | 292              | 39                                  | 32               |
| AlCrCuFeNi                                                                                | 270              | 77.5                                | 33               |
| (Ru-Co)O <sub>x</sub>                                                                     | 171.2            | 60.8                                | 7                |
| Ru <sub>1</sub> Ni <sub>1</sub> -NCNFs                                                    | 290              | /                                   | 8                |
| RuO <sub>2</sub> /NiO/NF                                                                  | 250              | 50.5                                | 10               |
| Ru-NiFe-MOF/NF                                                                            | 205              | 50                                  | 34               |
| Ru <sub>5A</sub> CoFe <sub>2</sub> /G                                                     | 180              | 51                                  | 35               |
| NiFe-MOF-5                                                                                | 168              | 42                                  | 14               |
| Ru/NF-2                                                                                   | 330              | 62                                  | 15               |
| Ru-CoV-LDH/NF                                                                             | 230              | 81.2                                | 24               |
| Ru-NiFe LDH-F/NF                                                                          | 230.0            | 50.2                                | 36               |
| Co(S)-Fe(S)                                                                               | 355              | 62                                  | 37               |
| Ni:Pi-Fe/NF                                                                               | 220              | 37                                  | 38               |
| Ni <sub>2</sub> P/(NiFe) <sub>2</sub> P(O) NAs                                            | 150              | 60                                  | 39               |
| Cu <sub>0.81</sub> Co <sub>2.19</sub> O <sub>4</sub>                                      | 290              | 65.6                                | 40               |
| NiFe/NF                                                                                   | 191              | 44.1                                | 41               |

**Supplementary Table 8.** Summarized overpotentials at 10 mA cm<sup>-2</sup> ( $\eta_{10}$ ) and Tafel slopes of electrocatalysts for OWS in 1.0 M KOH.

| Electrocatalysts                       | cell voltage @ 10 mA cm <sup>-2</sup> | Ref              |
|----------------------------------------|---------------------------------------|------------------|
| <b>FeCoNiMnRu/CNFs</b>                 | <b>1.452</b>                          | <b>This work</b> |
| FeNiCoCrMn-G                           | 1.63                                  | 5                |
| (Ru-Co)O <sub>x</sub>                  | 1.488                                 | 7                |
| Ru <sub>1</sub> Ni <sub>1</sub> -NCNFs | 1.564                                 | 8                |
| RuO <sub>2</sub> /NiO/NF               | 1.5                                   | 10               |
| Ru-NiFe-P                              | 1.47                                  | 11               |
| NiFe-MOF-5                             | 1.57                                  | 14               |
| Ru/NF-2                                | 1.56                                  | 15               |
| Ru/Ni(OH) <sub>2</sub> /NF             | 1.50                                  | 20               |
| Ru-CoV-LDH/NF                          | 1.50                                  | 24               |

**Supplementary Table 9.**  $\Delta G_{H^*}$  of Fe-, Co-, Ni-, Ru-sites in FeCoNiMnRu with various atomic configurations.

| Structure       | Site | H Free Energy (eV) |
|-----------------|------|--------------------|
| Configuration 1 | Fe   | -0.22954           |
|                 | Ni   | -0.23571           |
|                 | Co   | -0.25067           |
|                 | Ru   | -0.21156           |
| Configuration 2 | Fe   | -0.20215           |
|                 | Ni   | -0.30751           |
|                 | Co   | -0.20661           |
|                 | Ru   | -0.11792           |
| Configuration 3 | Fe   | -0.25743           |
|                 | Ni   | -0.18365           |
|                 | Co   | -0.21365           |
|                 | Ru   | -0.21036           |
| Configuration 4 | Fe   | -0.13054           |
|                 | Ni   | -0.27281           |
|                 | Co   | -0.43812           |
|                 | Ru   | -0.07115           |
| Configuration 5 | Fe   | -0.32153           |
|                 | Ni   | -0.34089           |
|                 | Co   | -0.26261           |
|                 | Ru   | -0.25932           |
| Configuration 6 | Fe   | -0.31425           |
|                 | Ni   | -0.21751           |
|                 | Co   | -0.20561           |
|                 | Ru   | -0.206913          |
| Configuration 7 | Fe   | -0.305413          |
|                 | Ni   | -0.215841          |
|                 | Co   | -0.236172          |
|                 | Ru   | -0.213653          |
| Configuration 8 | Fe   | -0.31423           |
|                 | Ni   | -0.25361           |
|                 | Co   | -0.21454           |
|                 | Ru   | -0.20361           |

**Supplementary Table 10.**  $\Delta G_{H^*}$  of Fe-, Co-, Ni-, Ru-sites in FeCoNiCrRu with various atomic configurations.

| Structure       | Site | H Free Energy (eV) |
|-----------------|------|--------------------|
| Configuration 1 | Fe   | -0.29541           |
|                 | Ni   | -0.25816           |
|                 | Co   | -0.29615           |
|                 | Ru   | -0.26035           |
| Configuration 2 | Fe   | -0.39654           |
|                 | Ni   | -0.33263           |
|                 | Co   | -0.31951           |
|                 | Ru   | -0.20592           |
| Configuration 3 | Fe   | -0.32542           |
|                 | Ni   | -0.20654           |
|                 | Co   | -0.29234           |
|                 | Ru   | -0.26015           |
| Configuration 4 | Fe   | -0.21879           |
|                 | Ni   | -0.34942           |
|                 | Co   | -0.60138           |
|                 | Ru   | -0.14727           |
| Configuration 5 | Fe   | -0.30413           |
|                 | Ni   | -0.36581           |
|                 | Co   | -0.27156           |
|                 | Ru   | -0.26571           |
| Configuration 6 | Fe   | -0.32474           |
|                 | Ni   | -0.25415           |
|                 | Co   | -0.26027           |
|                 | Ru   | -0.22941           |
| Configuration 7 | Fe   | -0.341552          |
|                 | Ni   | -0.245913          |
|                 | Co   | -0.263512          |
|                 | Ru   | -0.289521          |
| Configuration 8 | Fe   | -0.30355           |
|                 | Ni   | -0.26304           |
|                 | Co   | -0.20148           |
|                 | Ru   | -0.23651           |

**Supplementary Table 11.**  $\Delta G_{\text{H}^*}$  of Fe-, Co-, Ni-, Ru-sites in FeCoNiCuRu with various atomic configurations.

| Structure       | Site | H Free Energy (eV) |
|-----------------|------|--------------------|
| Configuration 1 | Fe   | -0.3136            |
|                 | Ni   | -0.2715            |
|                 | Co   | -0.2815            |
|                 | Ru   | -0.2715            |
| Configuration 2 | Fe   | -0.32695           |
|                 | Ni   | -0.37994           |
|                 | Co   | -0.38255           |
|                 | Ru   | -0.26513           |
| Configuration 3 | Fe   | -0.31361           |
|                 | Ni   | -0.27156           |
|                 | Co   | -0.28154           |
|                 | Ru   | -0.26556           |
| Configuration 4 | Fe   | -0.29566           |
|                 | Ni   | -0.40929           |
|                 | Co   | -0.52791           |
|                 | Ru   | -0.23708           |
| Configuration 5 | Fe   | -0.32551           |
|                 | Ni   | -0.32692           |
|                 | Co   | -0.29647           |
|                 | Ru   | -0.28691           |
| Configuration 6 | Fe   | -0.33691           |
|                 | Ni   | -0.27571           |
|                 | Co   | -0.29617           |
|                 | Ru   | -0.33654           |
| Configuration 7 | Fe   | -0.35691           |
|                 | Ni   | -0.29657           |
|                 | Co   | -0.27891           |
|                 | Ru   | -0.28952           |
| Configuration 8 | Fe   | -0.36694           |
|                 | Ni   | -0.22656           |
|                 | Co   | -0.29651           |
|                 | Ru   | -0.26015           |

## Supplementary reference

1. Yao, R. et al. Nanoporous surface high-entropy alloys as highly efficient multisite electrocatalysts for nonacidic hydrogen evolution reaction. *Adv. Funct. Mater.* **31**, 2009613 (2021).
2. Jia, Z. et al. A novel multinary intermetallic as an active electrocatalyst for hydrogen evolution. *Adv. Mater.* **32**, 2000385 (2020).
3. Zhang, G. et al. High entropy alloy as a highly active and stable electrocatalyst for hydrogen evolution reaction. *Electrochim. Acta* **279**, 19-23 (2018).
4. Guo, J. et al. High electrocatalytic hydrogen evolution activity on a coupled Ru and CoO hybrid electrocatalyst. *J. Energy Chem.* **37**, 143-147 (2019).
5. Nguyen, T. X., Su, Y., Lin, C., Ruan, J. & Ting, J. A new high entropy glycerate for high performance oxygen evolution reaction. *Adv. Sci.* **8**, 2002446 (2021).
6. Jia, Z. et al. A self-supported high-entropy metallic glass with a nanosponge architecture for efficient hydrogen evolution under alkaline and acidic conditions. *Adv. Funct. Mater.* 2101586 (2021).
7. Wang, C. & Qi, L. Heterostructured inter-doped ruthenium–cobalt oxide hollow nanosheet arrays for highly efficient overall water splitting. *Angew. Chem. Int. Ed.* **59**, 1–7 (2020).
8. Li, M. et al. RuNi nanoparticles embedded in N-doped carbon nanofibers as a robust bifunctional catalyst for efficient overall water splitting. *Adv. Sci.* **7**, 1901833 (2020).
9. Xiao, X. et al. In situ growth of Ru nanoparticles on (Fe,Ni)(OH)<sub>2</sub> to boost hydrogen evolution activity at high current density in alkaline media. *Small Methods* **4**, 1900796 (2020).
10. Liu, J. et al. NiO as a bifunctional promoter for RuO<sub>2</sub> toward superior overall water splitting. *Small* **14**, 1704073 (2018).
11. Qu, M. et al. Regulating electron density of NiFe-P nanosheets electrocatalysts by a trifle of Ru for high-efficient overall water splitting. *Appl. Catal. B: Environ.* **263**, 118324 (2020).
12. Wang, D., Li, Q., Han, C., Xing, Z. & Yang, X. Single-atom ruthenium based catalyst for enhanced hydrogen evolution. *Appl. Catal. B: Environ.* **249**, 91-97 (2019).
13. Li, D. et al. Boosting hydrogen evolution activity in alkaline media with dispersed ruthenium clusters in NiCo-layered double hydroxide. *Electrochem. Commun.* **101**, 23-27 (2019).
14. Mou, Q. et al. A bimetal hierarchical layer structure MOF grown on Ni foam as a bifunctional catalyst for the OER and HER. *Inorg. Chem. Front.* **8**, 2889 (2021).
15. Pei, Y. et al. Interface engineering with ultralow ruthenium loading for efficient water splitting. *ACS Appl. Mater. Interfaces* **12**, 36177–36185 (2020).
16. Zhang, H., Zhou, W., Lu, X. F., Chen, T. & Lou, X. W. Implanting isolated Ru atoms into edge-rich carbon matrix for efficient electrocatalytic hydrogen evolution. *Adv. Energy Mater.* **10**, 2000882 (2020).
17. Fan, L. et al. Ru nanoparticles encapsulated in ZIFs-derived porous N-doped hierarchical carbon nanofibers for enhanced hydrogen evolution reaction. *Catal. Sci. Technol.* **10**, 7302–7308 (2020).
18. Ding, R. et al. Salt template-assisted in situ construction of Ru nanoclusters and porous carbon: excellent catalysts toward hydrogen evolution, ammonia-borane hydrolysis, and 4-nitrophenol reduction. *Green Chem.* **22**, 835–842 (2020).
19. Fan, L. et al. Electrospun Ru–RuO<sub>2</sub>/MoO<sub>3</sub> carbon nanorods with multi-active components: a Pt-like catalyst for the hydrogen evolution reaction. *Chem. Commun.* **56**, 739-742 (2020).
20. Chen, Q., Yang, X., Hou, C., Li, K. & Chen, Y. Inlay of ultrafine Ru nanoparticles into a self-supported Ni(OH)<sub>2</sub> nanoarray for hydrogen evolution with low overpotential and enhanced kinetics. *J. Mater. Chem. A* **7**, 11062–11068 (2019).
21. Xia, J. et al. Low-cost porous ruthenium layer deposited on Ni foam as a highly active universal-pH electrocatalyst for hydrogen evolution reaction. *ChemSusChem* **12**, 2780-2787 (2019).
22. Barman, B. K. et al. In situ decoration of ultrafine Ru nanocrystals on N-doped graphene tube and their applications as oxygen reduction and hydrogen evolution catalyst. *ACS Appl. Energy Mater.* **2**, 7330–7339 (2019).
23. Zhang, H. et al. Synergistic engineering of morphology and electronic structure in constructing metal-organic framework-derived Ru doped cobalt-nickel oxide heterostructure towards efficient alkaline hydrogen evolution reaction. *Chem. Eng. J.*

426, 131300 (2021).

24. Li, W., Feng, B., Yi, L., Li, J. & Hu, W. Highly efficient alkaline water splitting with Ru-doped Co-V layered double hydroxide nanosheets as bifunctional electrocatalyst. *ChemSusChem* **14**, 730-737 (2021).

25. Wei, R. et al. Defect-rich FeCoNiPB/(FeCoNi)<sub>3</sub>O<sub>4-x</sub> high-entropy composite nanoparticles for oxygen evolution reaction: impact of surface activation. *Appl. Surf. Sci.* **549**, 149327 (2021).

26. Dai, W., Lu, T. & Pan, Y. Novel and promising electrocatalyst for oxygen evolution reaction based on MnFeCoNi high entropy alloy. *J. Power Sources* **430**, 104-111 (2019).

27. Wang, H. et al. Nanostructured amorphous Fe<sub>29</sub>Co<sub>27</sub>Ni<sub>23</sub>Si<sub>9</sub>B<sub>12</sub> high-entropy-alloy: an efficient electrocatalyst for oxygen evolution reaction. *J. Mater. Sci. Technol.* **68**, 191-198 (2021).

28. Tang, J., Xu, J. L., Ye, Z. G., Li, X. B. & Luo, J. M. Microwave sintered porous CoCrFeNiMo high entropy alloy as an efficient electrocatalyst for alkaline oxygen evolution reaction. *J. Mater. Sci. Technol.* **79**, 171-177 (2021).

29. Ding, Z. et al. High entropy intermetallic–oxide core–shell nanostructure as superb oxygen evolution reaction catalyst. *Adv. Sustainable Syst.* **4**, 1900105 (2020).

30. Nguyen, T. X., Liao, Y., Lin, C., Su, Y. & Ting, J. Advanced high entropy perovskite oxide electrocatalyst for oxygen evolution reaction. *Adv. Funct. Mater.* **31**, 2101632 (2021).

31. Zhang, L., Cai, W. & Bao, N. Top-level design strategy to construct an advanced high-entropy Co–Cu–Fe–Mo (oxy)hydroxide electrocatalyst for the oxygen evolution reaction. *Adv. Mater.* **33**, 2100745 (2021).

32. Sukkurji, P. A. et al. Mechanochemical synthesis of novel rutile-type high entropy fluorides for electrocatalysis. *J. Mater. Chem. A* **9**, 8998–9009 (2021).

33. Liu, L., Li, N., Han, M., Han, J. & Liang, H. Scalable synthesis of nanoporous high entropy alloys for electrocatalytic oxygen evolution. *Rare Met.* (2021).

34. Lin, Y., Zhao, L., Wang, L. & Gong, Y. Ruthenium-doped NiFe-based metal–organic framework nanoparticles as highly efficient catalysts for the oxygen evolution reaction. *Dalton Trans.* **50**, 4280–4287 (2021).

35. Lee, J. et al. Stabilizing the OOH\* intermediate via pre-adsorbed surface oxygen of a single Ru atom-bimetallic alloy for ultralow overpotential oxygen generation. *Energy Environ. Sci.* **13**, 5152-5164 (2020).

36. Wang, Y. et al. Interfacial synergy between dispersed Ru sub-nanoclusters and porous NiFe layered double hydroxide on accelerated overall water splitting by intermediate modulation. *Nanoscale* **12**, 9669–9679 (2020).

37. Maccato, C. et al. Plasma-assisted synthesis of Co<sub>3</sub>O<sub>4</sub>-based electrocatalysts on Ni foam substrates for the oxygen evolution reaction. *Adv. Mater. Interfaces* **8**, 2100763 (2021).

38. Li, Y. & Zhao, C. Iron-doped nickel phosphate as synergistic electrocatalyst for water oxidation. *Chem. Mater.* **28**, 5659–5666 (2016).

39. Xi, W. et al. Oxygen-doped nickel iron phosphide nanocube arrays grown on Ni foam for oxygen evolution electrocatalysis. *Small* **14**, 1802204 (2018).

40. Choi, W. et al. Three-dimensional honeycomb-like Cu<sub>0.81</sub>Co<sub>2.19</sub>O<sub>4</sub> nanosheet arrays supported by Ni foam and their high efficiency as oxygen evolution electrodes. *ACS Appl. Mater. Interfaces* **10**, 38663–38668 (2018).

41. Jin, J. et al. Exceptional electrocatalytic oxygen evolution efficiency and stability from electrodeposited NiFe alloy on Ni foam. *Electrochim. Acta* **299**, 567-574 (2019).
